1 **Antagonistic modules, SIB1 and LSD1, regulate photosynthesis-associated nuclear**  
2 **genes via GOLDEN2-LIKE transcription factors in Arabidopsis**

3

4 Mengping Li<sup>1,2,a</sup>, Keun Pyo Lee<sup>1,a</sup>, Tong Liu<sup>1,2</sup>, Vivek Dogra<sup>1,b</sup>, Jianli Duan<sup>1</sup>,  
5 Mengshuang Li<sup>1,2</sup>, Weiman Xing<sup>1</sup>, and Chanhong Kim<sup>1,c</sup>

6

7 <sup>1</sup> Shanghai Center for Plant Stress Biology, CAS Center for Excellence in Molecular  
8 Plant Sciences, Chinese Academy of Sciences, Shanghai 200032, China.

9 <sup>2</sup> University of the Chinese Academy of Sciences, Beijing 100049, China.

10 <sup>a</sup> These authors contributed equally to this work.

11 <sup>b</sup> Present address: Biotechnology Division, CSIR-Institute of Himalayan Bioresource  
12 Technology, Palampur 176061, India

13 <sup>c</sup> Correspondence: [chanhongkim@cemps.ac.cn](mailto:chanhongkim@cemps.ac.cn)

14

15 Running title: SIB1 and LSD1 modulate GLK activity

16

17

18

19

20

21

22

23

24

25

26

27 **ABSTRACT**

28 GOLDEN2-LIKE (GLK) transcription factors drive the expression of photosynthesis-  
29 associated nuclear genes (PhANGs), indispensable for chloroplast biogenesis. We  
30 previously demonstrated that the salicylic acid (SA)-induced SIGMA FACTOR-  
31 BINDING PROTEIN 1 (SIB1), a transcription coregulator and positive regulator of  
32 cell death, interacts with GLK1 and GLK2 to reinforce their activities. The SIB1-GLK  
33 interaction raises the level of light-harvesting antenna proteins in photosystem II,  
34 aggravating photoinhibition and singlet oxygen ( $^1\text{O}_2$ ) burst.  $^1\text{O}_2$  then contributes to SA-  
35 induced cell death via EXECUTER 1 (EX1,  $^1\text{O}_2$  sensor protein)-mediated retrograde  
36 signaling upon reaching a critical level. We now reveal that LESION-SIMULATING  
37 DISEASE 1 (LSD1), a transcription coregulator and negative regulator of SA-primed  
38 cell death, interacts with GLK1/2 to repress their activities. Consistently, the  
39 overexpression of LSD1 represses GLK target genes including PhANGs, whereas the  
40 loss of LSD1 increases their expression. Remarkably, LSD1 overexpression inhibits  
41 chloroplast biogenesis, resembling the characteristic *glk1glk2* double mutant phenotype.  
42 The subsequent chromatin immunoprecipitation analysis coupled with quantitative  
43 PCR further reveals that LSD1 inhibits the DNA-binding activity of GLK1 towards its  
44 target promoters. The SA-induced nuclear-targeted SIB1 appears to counteractively  
45 interact with GLK1/2, leading to the activation of EX1-mediated  $^1\text{O}_2$  signaling. Taken  
46 together, we provide a working model that SIB1 and LSD1, mutually exclusive SA-  
47 signaling components, antagonistically regulate GLK1/2 to fine-tune the expression of  
48 PhANGs, thereby modulating  $^1\text{O}_2$  homeostasis and related stress responses.

49

50 **Key words:** SIB1; LSD1; GLK; photosynthesis-associated nuclear genes; singlet  
51 oxygen; EXECUTER1; salicylic acid; retrograde signaling

52

53

54

55

## 56 INTRODUCTION

57 Chloroplasts communicate with the nucleus via retrograde signaling (RS) in response  
58 to the ever-changing environment. Upon exposure to unfavorable environmental  
59 conditions, chloroplasts downregulate photosynthesis-associated nuclear genes  
60 (PhANGs), referred to as biogenic RS, but stimulate the expression of stress-related  
61 genes via alternate RS pathways, collectively called operational RS. The nuclear-  
62 encoded chloroplast GENOMES UNCOUPLED 1 (GUN1) protein plays a pivotal role  
63 in the biogenic RS (Nott et al., 2006). GUN1 integrates various retrograde signals  
64 released by the disturbance in plastid gene expression, redox homeostasis, and  
65 tetrapyrrole biosynthesis in chloroplasts (Chan et al., 2016; Koussevitzky et al., 2007;  
66 Nott et al., 2006). The well-known downstream targets of GUN1-mediated RS are two  
67 nuclear genes encoding the GOLDEN2-LIKE (GLK) transcription factors (TFs)  
68 (Martin et al., 2016; Waters et al., 2009). In fact, GUN1-mediated RS represses *GLK*  
69 transcription. In *Arabidopsis thaliana* (Arabidopsis), GLK1 and GLK2 function  
70 redundantly to express PhANGs, promoting chloroplast biogenesis. Consistently, the  
71 loss of both GLKs significantly impairs chloroplast biogenesis (Fitter et al., 2002).

72 Recent studies discovered an unexpected function of GLKs towards plant immune  
73 responses. The steady-state levels of salicylic acid (SA)-responsive genes are  
74 significantly lower in GLK1-overexpressing (*oxGLK1*) Arabidopsis transgenic plants  
75 relative to wild-type (WT) plants (Savitch et al., 2007). Accordingly, the *oxGLK1* plants  
76 are susceptible to the biotrophic pathogen *Hyaloperonospora arabidopsidis* (*Hpa*)  
77 *Noco2*, while *glk1 glk2* double knockout mutant plants are more resistant compared to  
78 WT plants (Murmu et al., 2014). However, other studies reported that GLKs confer  
79 resistance towards the cereal fungal pathogen *Fusarium graminearum* (Savitch et al.,  
80 2007), necrotrophic fungal pathogen *Botrytis cinerea* (Murmu et al., 2014), and the  
81 Cucumber mosaic virus (Han et al., 2016). These findings indicate that multiple  
82 regulatory circuits (positive and negative) may differently modulate GLK activity  
83 towards various microbial pathogens.

84 We lately demonstrated that the nuclear-targeted SIGMA FACTOR-BINDING  
85 PROTEIN 1 (SIB1), a defense-related transcription coregulator, interacts with GLK1/2  
86 in response to an increase in foliar SA (Lai et al., 2011; Lv et al., 2019). In  
87 *Arabidopsis lesion-simulating disease 1 (lsd1)* mutant grown under continuous light  
88 (CL) conditions, the transiently increased level of SA rapidly induces the otherwise  
89 undetectable SIB1, leading to its accumulation in both the nucleus and the chloroplasts  
90 (Lai et al., 2011; Lv et al., 2019). It is important to note that the extended daylength is  
91 one of the lesion-triggering external factors evoking SA-dependent runaway  
92 (uncontrolled) cell death (RCD) in the *lsd1* mutant (Dietrich et al., 1994; Lv et al., 2019).  
93 The SA receptor Nonexpresser of PR genes 1 (NPR1) induces the expression of *SIB1*  
94 and the dual targeting of SIB1 also occurs in WT plants after SA treatment (Lai et al.,  
95 2011; Lv et al., 2019; Xie et al., 2010). Whereas the loss of NPR1 abolishes *lsd1* RCD,  
96 the loss of SIB1 significantly delays RCD (Aviv et al., 2002; Lv et al., 2019), indicating  
97 that SIB1 is one of the RCD-triggering components directed by NPR1. The SIB1-GLK  
98 interaction in the nucleus enhances the expression of PhANGs, while chloroplast-  
99 localized SIB1 (cpSIB1) represses the expression of photosynthesis-associated plastid  
100 genes (PhAPGs) (Lv et al., 2019; Morikawa et al., 2002). This concurrent uncoupled  
101 expression of PhANGs and PhAPGs increases singlet oxygen ( $^1\text{O}_2$ ) levels in  
102 chloroplasts through enhanced photoinhibition in PSII (Lv et al., 2019). EXECUTER  
103 1 (EX1), a  $^1\text{O}_2$  sensor protein (Dogra et al., 2019), then mediates  $^1\text{O}_2$ -triggered RS to  
104 contribute to stress responses in *lsd1* mutant plants (Lv et al., 2019). It appears that  
105 SIB1 undergoes co-translational N-terminal acetylation (NTA) and post-translational  
106 ubiquitination (Li et al., 2020). While NTA renders the nuclear SIB1 (nuSIB1) more  
107 stable, the latter modification promotes its turnover via the ubiquitin-proteasome  
108 system (UPS). The interplay of NTA and UPS seems to regulate nuSIB1-mediated  
109 stress responses finely. Nonetheless, earlier reports regarding the positive role of both  
110 nuSIB1 and cpSIB1 to RCD suggest that LSD1 may be required to repress the  
111 expression of PhANGs to sustain  $^1\text{O}_2$  homeostasis.

112 Here, we demonstrate that LSD1, a transcription coregulator and negative regulator  
113 of cell death, interacts with GLK1/2. LSD1 considerably diminishes the GLK binding  
114 activity to promoters of the examined PhANGs in Arabidopsis. In agreement, LSD1-  
115 overexpressing plants exhibit significantly reduced levels of PhANGs, whereas loss of  
116 LSD1 causes a notable upregulation of PhANGs relative to WT plants. SA most likely  
117 intervenes in the LSD1-GLK interaction through a rapid accumulation of nuSIB1,  
118 leading to a nuSIB1-GLKs interaction, enhanced expression of PhANGs, and activation  
119 of EX1-dependent  $^1\text{O}_2$  signaling implicated in cell death. We thus concluded that the  
120 stress-associated but mutually exclusive transcription coregulators nuSIB1 (positive  
121 regulator) and LSD1 (negative regulator) antagonistically regulate the expression of  
122 PhANGs through the physical interaction with GLKs. Such antagonistic regulation of  
123 GLK activity by nuSIB1 and LSD1 might be instrumental in sustaining  $^1\text{O}_2$  homeostasis  
124 under SA-associated stress conditions.

## 125 RESULTS

### 126 LSD1 interacts with the GOLDEN2-LIKE transcription factors GLK1 and GLK2

127 The stress hormone SA primes cell death in the *lsd1* mutant in a light-dependent manner,  
128 a typical characteristic of most lesion mimic mutants, as manifested by the abrogated  
129 cell death by either loss of key SA signaling components (such as NPR1) or  
130 overexpression of the bacterial salicylate hydroxylase NahG that metabolizes SA (Lv  
131 et al., 2019; Muhlenbock et al., 2008). Upon exposure to various stimuli, including light,  
132 cold, UV-C, red light, hypoxia, and pathogens (Chai et al., 2015; Dietrich et al., 1997;  
133 Huang et al., 2010; Jabs et al., 1996; Karpinski et al., 2013; Muhlenbock et al., 2007;  
134 Muhlenbock et al., 2008; Rusaczek et al., 2015), *lsd1* mutant plants drastically  
135 develop the foliar RCD phenotype. Among those differentially regulated genes prior to  
136 the onset of RCD, the SA-induced transcription coregulator nuSIB1 potentiates the  
137 expression of PhANGs and stress-related genes by modulating the TF activity of  
138 GLK1/2 and WRKY33, respectively (Lai et al., 2011; Lv et al., 2019; Zarrinpar et al.,  
139 2003). These data suggest a possible antagonism between LSD1 and nuSIB1 because

140 nuSIB1-driven stress responses occur in the absence of LSD1. In this regard, we sought  
141 if LSD1 also interacts with GLK1/2 to modulate the expression of PhANGs.

142 We then generated Arabidopsis WT transgenic plants overexpressing GREEN  
143 FLUORESCENT PROTEIN (GFP)-tagged LSD1 under the control of the CaMV 35S  
144 promoter (35S) (hereafter *oxLSD1*) to unveil putative LSD1-associated proteins. The  
145 immunoblot assay detected the LSD1-GFP fusion protein at the predicted molecular  
146 mass of approximately 46 kD using an anti-GFP antibody (Supplemental Figure 1).  
147 Next, using GFP antibody-conjugated magnetic beads, we co-immunoprecipitated  
148 LSD1-GFP and its putative associated proteins from the transgenic plants. The trypsin-  
149 digested protein samples were then subjected to tandem mass spectrometry (MS)  
150 analyses. The co-immunoprecipitation (Co-IP) coupled to MS analysis using three  
151 independent biological replicates identified 217 proteins, which were detected in at  
152 least two independent biological replicates, but absent in protein samples of WT and  
153 GFP-overexpressing transgenic plants (*35S:GFP*) (Supplemental Dataset 1).

154 Accordingly, among the 217 proteins, we identified both GLK1 and GLK2  
155 (Supplemental Dataset 1). In Arabidopsis, GLK1 and its homolog GLK2 share around  
156 50% amino acid sequence identity. Both contain two conserved domains, a DNA-  
157 binding domain (DBD) and a GLK1/2-specific C-terminal GCT-box (Supplemental  
158 Figure 2) (Fitter et al., 2002; Rossini et al., 2001). A domain comparison between GLK1  
159 and GLK2 shows a 90% and 79% identity, respectively (Bravo-Garcia et al., 2009).  
160 Therefore, it is not surprising that both GLK1 and GLK2 were detected as putative  
161 LSD1-associated proteins. Next, we performed a bimolecular fluorescence  
162 complementation (BiFC) assay in *Nicotiana benthamiana* (*N. benthamiana*) leaves.  
163 Consistent with the previous report (Czarnocka et al., 2017), we confirmed the LSD1-  
164 LSD1 interaction in the nucleus, as evident in the overlapped signals detected from  
165 YELLOW FLUORESCENT PROTEIN (YFP) and blue-fluorescent DNA stain 4', 6-  
166 diamidino-2-phenylindole (DAPI)-stained nucleus, as well as in the cytosol (Figure 1A).  
167 Similarly, we observed a YFP signal in *N. benthamiana* leaf coexpressing LSD1-YFP<sup>N</sup>  
168 and GLK1 (or GLK2)-YFP<sup>C</sup> (Figure 1A). All YFP signals were exclusively observed

169 in the nucleus (Figure 1A). The Co-IP and an ensuing immunoblot assay further  
 170 corroborated the LSD1-GLK interaction (Figure 1B). We also purified full-length  
 171 recombinant proteins of LSD1, GLK1, and GLK2 expressed in *Escherichia coli*.  
 172 Subsequent gel filtration assays demonstrated that GLK1 (Figure 1C and 1E) and GLK2  
 173 (Figure 1D and 1E) form a complex with LSD1, as shown by their co-migration.

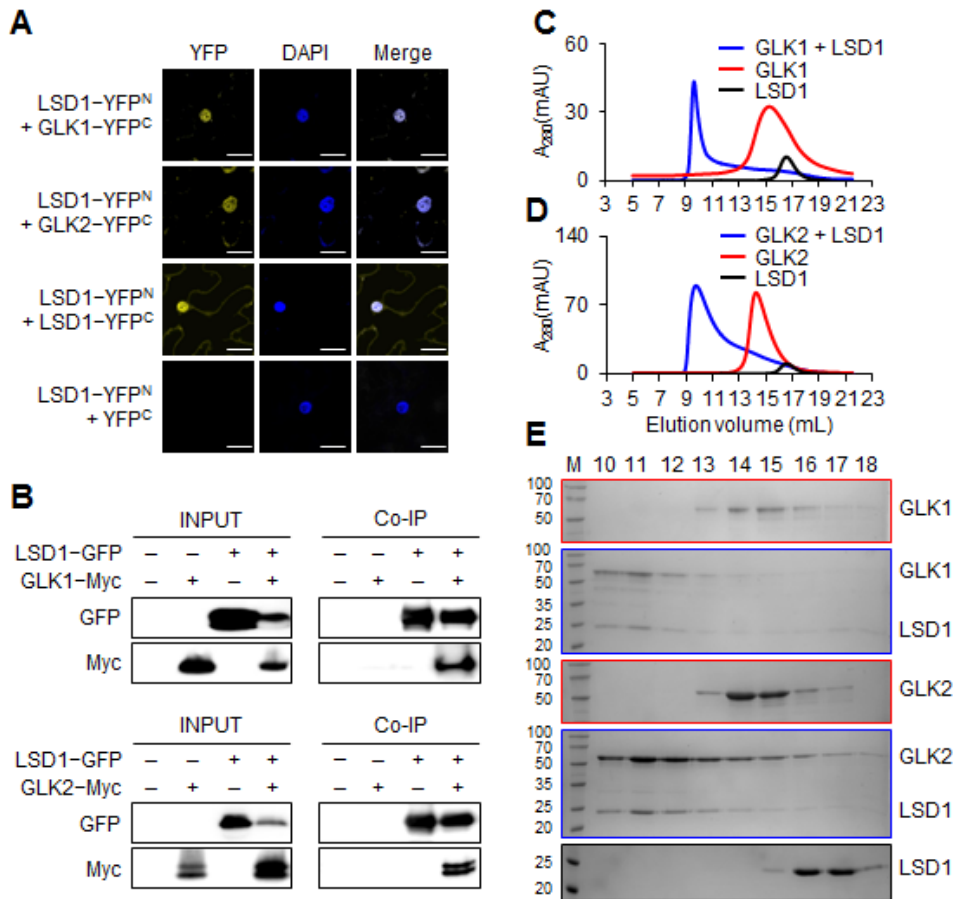

174

175 **Figure 1. LSD1 interacts with GLK1 and GLK2.**

176 **(A)** Bimolecular fluorescence complementation (BiFC) assays. The GLK1 or GLK2 fused with the C-  
 177 terminal part of YFP (YFP<sup>C</sup>) were coexpressed with the N-terminal part of the YFP (YFP<sup>N</sup>) fused with  
 178 LSD1 in *N. benthamiana* leaves. The combinations of LSD1-YFP<sup>N</sup> + LSD1-YFP<sup>C</sup> and LSD1-YFP<sup>N</sup> +  
 179 YFP<sup>C</sup> were used as a positive and negative control, respectively. DAPI was used to stain the nucleus. All  
 180 images were taken at the same scale (scale bars: 25 μm).

181 **(B)** Co-immunoprecipitation (Co-IP) analyses using *N. benthamiana* leaves transiently coexpressing  
 182 LSD1-GFP and GLK1-Myc (or GLK2-Myc). Co-IP was performed using GFP-Trap beads, and the  
 183 interaction was evaluated by using Myc antibody.

184 **(C-E)** Gel filtration assays showing *in vitro* interaction between LSD1 and GLK proteins expressed in  
 185 *E. coli*. Gel filtration profiles of LSD1, GLK1, and LSD1-GLK1 complex **(C)** and of LSD1, GLK2, and  
 186 LSD1-GLK2 complex **(D)**. A<sub>280</sub>(mAU), micro-ultraviolet absorbance at the wavelength of 280 nm.  
 187 Coomassie blue staining of the peak fractions following SDS-PAGE **(E)**. Numbers on top of SDS-PAGE  
 188 panels indicate elution volume (mL). M, molecular weight ladder (kD).

189 **LSD1 interacts with GLK1 and GLK2 through the proline-rich domain**

190 We then generated truncated GLK variants to determine which domain is required for  
191 the interaction with LSD1. Prior to the interaction analysis, GLK1/2 and their variants  
192 lacking either DBD, potential proline-rich domain (PRD, located between DBD and  
193 GCT-box; see discussion), or GCT-box were C-terminally fused with GFP to monitor  
194 their nuclear localization (Figure 2A; Supplemental Figure 2). Following transient  
195 expression, all intact and variants of Arabidopsis GLK1/2 localized in the nucleus in *N.*  
196 *benthamiana* leaves but with a weak cytosolic GFP signal of GCT-box-deleted GLK1  
197 and GLK2 (Supplemental Figure 3). To examine their interaction with Arabidopsis  
198 LSD1 protein, various combinations of BiFC constructs, as shown in Figure 2A, were  
199 expressed in *N. benthamiana* leaves to observe their interactions under the confocal  
200 microscope. The result clearly showed that the PRD of GLK1/2 is indispensable for the  
201 interaction with LSD1 (Figure 2B), further verified by Co-IP analyses (Figure 2C). We  
202 then generated GLK1/2 variants by C-terminal serial deletions to ascertain the  
203 significance of PRD for the interaction (Supplemental Figure 4A). All GFP-tagged  
204 proteins transiently expressed in *N. benthamiana* leaves were localized to the nucleus  
205 (Supplemental Figure 4B). The resulting BiFC and Co-IP analyses confirmed the  
206 critical role of PRD for LSD1 interaction, as evidenced by the lack of YFP signal when  
207 coexpressing LSD1 and GLK1/2 variants lacking the PRD-including C-terminal part  
208 (Supplemental Figure 4C and 4D).



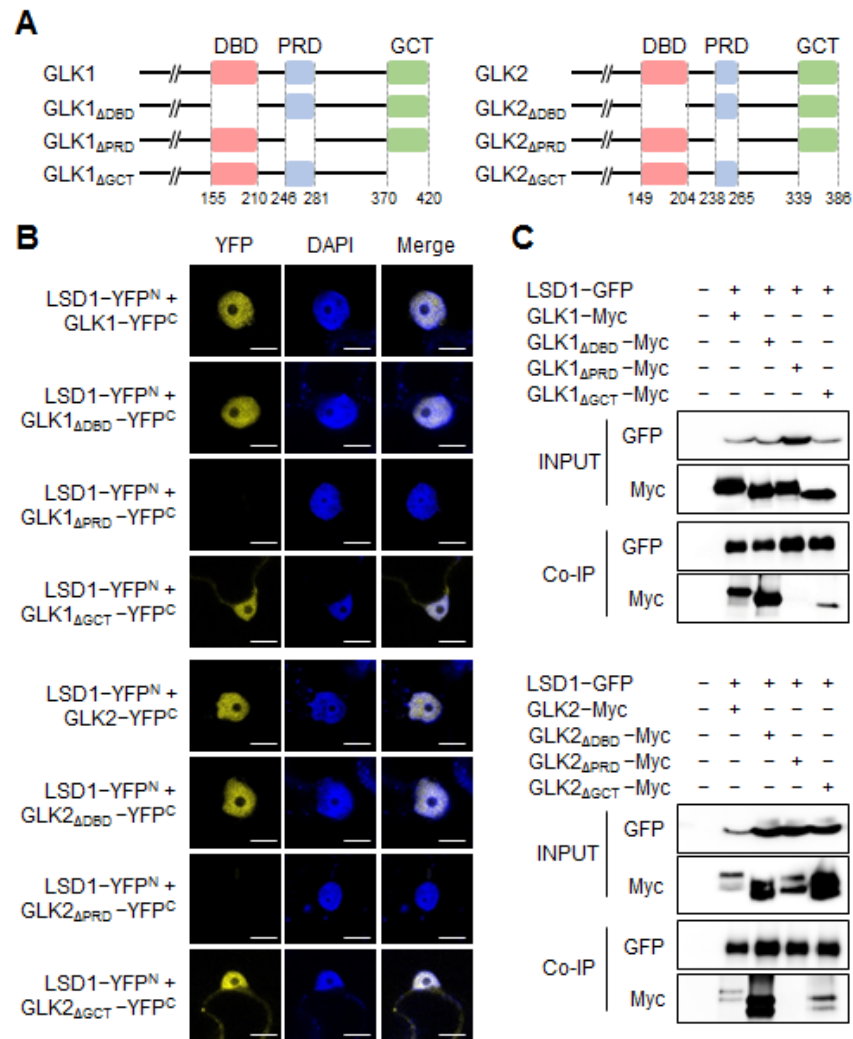

209

210 **Figure 2. PRD is indispensable for the interaction with LSD1.**

211 (A) Schematic diagrams show intact GLK1/2 as well as their domain-deleted variants.

212 (B) BiFC assays. Each of intact and domain-deleted GLK variants fused with YFP<sup>C</sup> was coexpressed  
 213 with LSD1 fused with YFP<sup>N</sup> in *N. benthamiana* leaves. DAPI was used to stain the nucleus. All images  
 214 were taken at the same scale (scale bars: 10 μm).

215 (C) Co-IP analyses using *N. benthamiana* leaves transiently coexpressing LSD1-GFP with the indicated  
 216 domain-deleted variant of GLK1/2 fused with Myc-tag.

217 **Loss of *LSD1* upregulates GLK target genes**

218 Given that GLKs promote the expression of PhANGs (Waters et al., 2009), it is  
 219 plausible that loss of LSD1 may primarily affect their abundance. To identify affected  
 220 genes either by loss of LSD1 or of GLK1/2, we compared the RNA sequencing (RNA-  
 221 seq) data of *lsd1* versus WT (Lv et al., 2019) and *glk1 glk2* versus WT (Ni et al., 2017).  
 222 As shown in Supplemental Figure 5A, a total of 91 genes (Supplemental Dataset 2) are  
 223 shared between the upregulated genes (395, at least twofold) in *lsd1* versus WT

224 (Supplemental Dataset 3) and the downregulated genes (936, at least twofold) in *glk1*  
225 *glk2* versus WT (Supplemental Dataset 4). The Gene Ontology enrichment analysis  
226 with the 91 genes for the biological process revealed that photosynthesis and light-  
227 harvesting in PSII are over-represented ( $P$ -value=1.42E-07) (Supplemental Figure 5B;  
228 Supplemental Dataset 5). The potentiated expression of PhANGs in *lsd1* versus WT  
229 plants is indicative of a negative role of LSD1 in GLK activity. To this end, we also  
230 examined the transcript abundance of PhANGs in WT, *glk1 glk2*, and two independent  
231 *oxLSD1* transgenic lines (Supplemental Figure 6A) using reverse transcription-  
232 quantitative PCR (RT-qPCR). The results indicated that the examined GLK target  
233 genes, such as genes encoding light-harvesting chlorophyll *a/b* binding proteins  
234 (LHCBs in PSII and LHCA1 in PSI) and chlorophyll synthesis enzymes were  
235 substantially repressed in *oxLSD1* relative to WT plants (Figure 3A). *oxLSD1* plants  
236 exhibited comparable levels of *GLK1* and *GLK2* transcripts relative to WT  
237 (Supplemental Figure 6B), implying that the repression of PhANGs likely resulted from  
238 the post-translational regulation of GLK1/2. Remarkably, the overexpression of LSD1-  
239 GFP fusion proteins in WT prematurely terminated chloroplast development, which is  
240 reminiscent of the phenotype observed in *glk1 glk2* double mutant (Figure 3B and 3C).  
241 Some mesophyll cells with nearly undetectable LSD1-GFP signals showed WT-like  
242 chloroplasts (Figure 3B). One explanation might be an ectopic cosuppression of the  
243 transgene, which also dilutes the molecular phenotypes (e.g., the transcript levels of  
244 PhANGs) in the examined leaf tissue. Two independent *oxLSD1* lines with higher *LSD1*  
245 transgene expression than the endogenous *LSD1* in WT plants (Figure 3D) exhibited  
246 similar phenotypes, such as partial cosuppression of the transgene, defect in chloroplast  
247 biogenesis, and reduced levels of LHCb proteins (Figure 3B, 3C, and 3E). Regardless  
248 of the promoters used (35S and native), all stable transgenic lines (over 20 lines)  
249 showed nearly undetectable or detectable GFP signals but with partial cosuppression  
250 (data not shown).

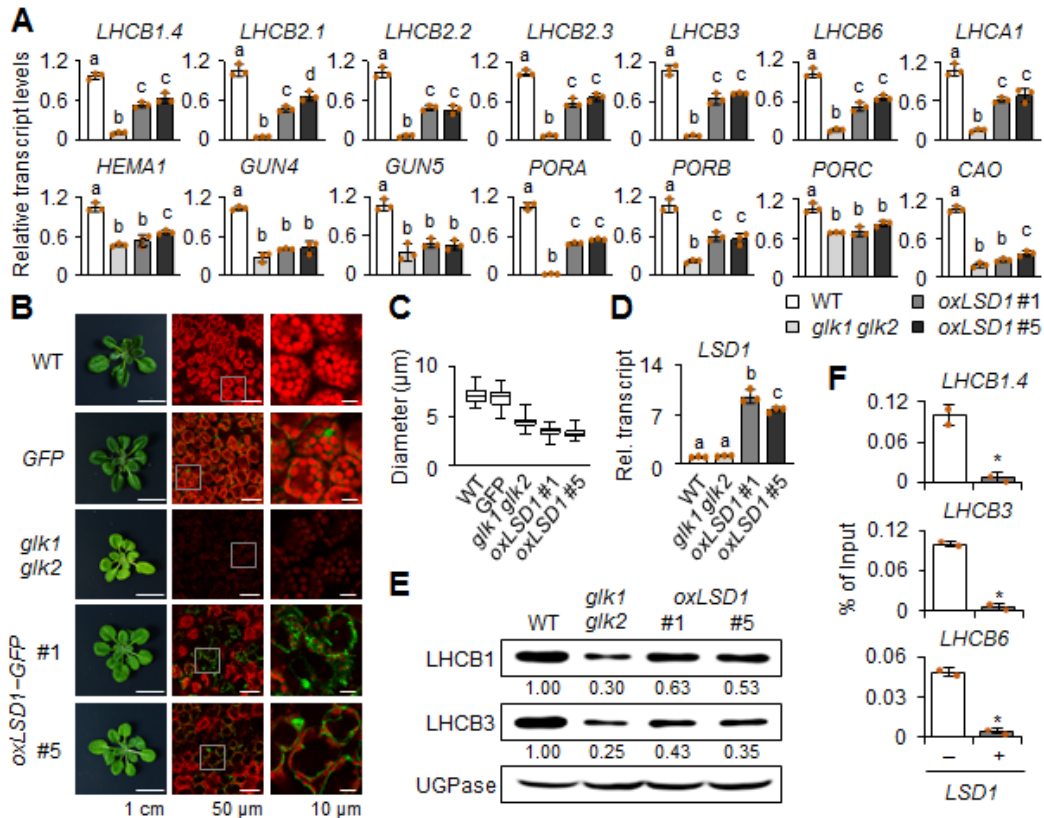

251

252 **Figure 3. Overexpression of LSD1 negatively affects the expression of GLK target genes and**  
253 **chloroplast biogenesis.**

254 (A) Relative transcript levels of GLK1 and GLK2 target genes, such as *LHCBs*, *LHCA1*, and chlorophyll  
255 synthesis genes including *glutamyl tRNA reductase (HEMA1/Glu-TR)*, *genome uncoupled 4 (GUN4)*,  
256 *magnesium chelatase H subunit (CHLH/GUN5)*, *protochlorophyllide oxidoreductase (POR) A*, *PORB*,  
257 *PORC*, and *chlorophyllide a oxygenase (CAO)* were examined in CL-grown 24-d-old WT, *glk1 glk2*,  
258 and *oxLSD1* (#1 and #5) plants using RT-qPCR.

259 (B) Plant phenotypes (left panels) and GFP fluorescence (green) of LSD1-GFP fusion proteins merged  
260 with chlorophyll autofluorescence signals (red; middle and right panels) in 24-d-old WT, *glk1 glk2*, and  
261 transgenic WT plants overexpressing GFP alone (*GFP*) or LSD1-GFP (*oxLSD1* #1 and #5) grown under  
262 CL conditions. The small white square boxes in the middle panels were enlarged (right panels).

263 (C) Means of chloroplast diameter. At least three confocal images taken from three independent leaves  
264 were used to measure the chloroplast diameter. For *oxLSD1*, only mesophyll cells with detectable GFP  
265 signals were chosen.

266 (D and E) Relative levels of *LSD1* transcript (D) and LHCB proteins (E) in 24-d-old CL-grown plants  
267 of WT, *glk1 glk2*, and *oxLSD1* #1 and #5. UGPase was used as a loading control for the immunoblot  
268 analysis in (E). Numbers at the bottom of each immunoblot result indicate the relative quantities of  
269 LHCB1 or LHCB3 proteins against the control signal of UGPase. For the RT-qPCR analyses in (A) and  
270 (D), *ACT2* was used as an internal standard. The value represents means  $\pm$  standard deviation (SD) (n=3).  
271 Lowercase letters indicate statistically significant differences between mean values ( $P < 0.05$ , one-way  
272 ANOVA with posthoc Tukey's HSD test).

273 (F) ChIP-qPCR results showing the effect of LSD1 overexpression on GLK1 binding to the promoter  
274 regions of its target genes (*LHCB1.4*, *LHCB3*, and *LHCB6*). Myc-tagged GLK1 (GLK1-Myc) was  
275 transiently expressed with (+ LSD1) or without LSD1-RFP (- LSD1) in Arabidopsis leaf protoplasts  
276 isolated from *lsd1 glk1 glk2* triple mutant. The enrichment value was normalized to the input sample,

277 representing means  $\pm$  SD from two independent ChIP assays. Asterisks denote statistically significant  
278 differences by Student's *t*-test ( $P < 0.01$ ) from the value of  $-LSD1$ .

### 279 **LSD1 inhibits the DNA-binding activity of GLK1**

280 Regarding that nuclear-localized LSD1 acts as a transcription coregulator and that  
281 LSD1 interacts with GLKs, it is conceivable that LSD1 might directly regulate the  
282 DNA-binding activity of GLK1/2. Therefore, we performed a chromatin  
283 immunoprecipitation (ChIP) coupled with a qPCR analysis. The relative activity of  
284 GLK1 towards its target promoters was examined in the presence or absence of LSD1  
285 using protoplasts isolated from the rosette leaves of *lsd1 glk1 glk2* triple mutant plants.  
286 Since GLK1 and GLK2 are highly unstable (Tokumaru et al., 2017; Waters et al., 2008),  
287 we used a protoplast transient expression system to ensure sufficient protein expression  
288 to elucidate the impact of LSD1 on GLK1 function. The *35S:GLK1-Myc* was transiently  
289 coexpressed with either *35S:RED FLUORESCENT PROTEIN (RFP)* or *35S:LSD1-*  
290 *RFP* in the protoplasts. ChIP assays were then performed with nuclear lysis from  
291 transfected protoplasts. With anti-Myc antibody-conjugated agarose beads, the Myc-  
292 tagged protein-DNA complex was pulled down. The immunoprecipitated DNA was  
293 then analyzed using qPCR to compare the DNA-binding activity of GLK1 in the  
294 presence or absence of LSD1. Afterward, we examined the relative expression levels  
295 of well-established GLK target genes such as *LHCB1.4*, *LHCB3*, and *LHCB6* (Waters  
296 et al., 2009). The results demonstrated that the presence of LSD1 markedly diminished  
297 the DNA-binding activity of GLK1 to promoters of these *LHCB* genes (Figure 3F).

### 298 **Loss of LSD1 potentiates <sup>1</sup>O<sub>2</sub>-triggered EX1-dependent RS in *flu* mutant**

299 We next validated the above ChIP assay result *in planta*. Considering the positive  
300 regulation of chlorophyll synthesis by GLK1 (Waters et al., 2009) and the repression  
301 of GLK activity by LSD1 (Figure 3A and 3F), it is tempting to hypothesize that loss of  
302 LSD1 might increase the rate of chlorophyll biosynthesis. By revisiting the previously  
303 published RNA-seq data (Lv et al., 2019), we noticed that a set of chlorophyll synthesis  
304 genes including *glutamyl tRNA reductase (HEMA1/Glu-TR)*, *genome uncoupled 4*  
305 (*GUN4*), *magnesium chelatase H subunit (GUN5/CHLH)*, *magnesium protoporphyrin*

306 *IX monomethyl ester cyclase (CHL27/CRD1)*, *protochlorophyllide oxidoreductase A*  
307 (*PORA*), and *chlorophyllide a oxygenase (CAO)* were markedly upregulated in *lsd1*  
308 before the onset of RCD (Figure 4A and 4B). We then analyzed the 5-aminolevulinic  
309 acid (5-ALA, the common precursor of all tetrapyrroles) synthesis rate in light-grown  
310 *lsd1* mutant plants treated with levulinic acid (LA) (Nandi and Shemin, 1968), a  
311 competitive chemical inhibitor of 5-ALA dehydratase that catalyzes the synthesis of  
312 porphobilinogen through the asymmetric condensation of two 5-ALA molecules  
313 (Figure 4A). It is important to note that the 5-ALA synthesis is the rate-limiting step  
314 for chlorophyll synthesis (Beale and Castelfranco, 1974; Hou et al., 2019) (Figure 4A).  
315 In view of the fact that FLUORESCENT (FLU) protein directly represses Glu-TR  
316 activity to inhibit protochlorophyllide (Pchlde) accumulation in the dark (Goslings et  
317 al., 2004) (Figure 4A) and that *flu* mutant plants exhibit a higher 5-ALA synthesis rate  
318 in the presence of LA under continuous light (CL) conditions (Goslings et al., 2004),  
319 we used *flu* as a positive control.

320 The 5-ALA synthesis rate was almost comparable in *lsd1* and *flu* seedlings in the  
321 presence of LA (Figure 4C). Although it is yet unclear whether the transcriptional  
322 upregulation of *HEMA1* is responsible for the 5-ALA accumulation in *lsd1*, the  
323 concurrent loss of both *FLU* and *LSD1* further increased the 5-ALA synthesis rate  
324 under CL conditions (Figure 4C). Since Pchlde levels in the dark would indirectly  
325 reflect chlorophyll biosynthesis rate owing to the absence of the enzyme(s) involved in  
326 Pchlde turnover (Forreiter and Apel, 1993), we measured Pchlde levels in dark-  
327 incubated plants of WT, *flu*, *lsd1*, and *lsd1 flu* using high-performance liquid  
328 chromatography analysis. As anticipated, Pchlde was highly upregulated in the *flu*  
329 mutant background, as demonstrated earlier (Meskauskiene et al., 2001) (Figure 4D).  
330 The loss of LSD1 raises the Pchlde level (approximately a 1.5-fold increase) in both  
331 WT and *flu* mutant backgrounds. The presence of FLU protein in *lsd1* seems to prevent  
332 the drastic accumulation of Pchlde in the dark. Collectively, these results corroborate  
333 the negative role of LSD1 towards GLK activity, which seems to be, at least in part,  
334 required for tetrapyrrole homeostasis.

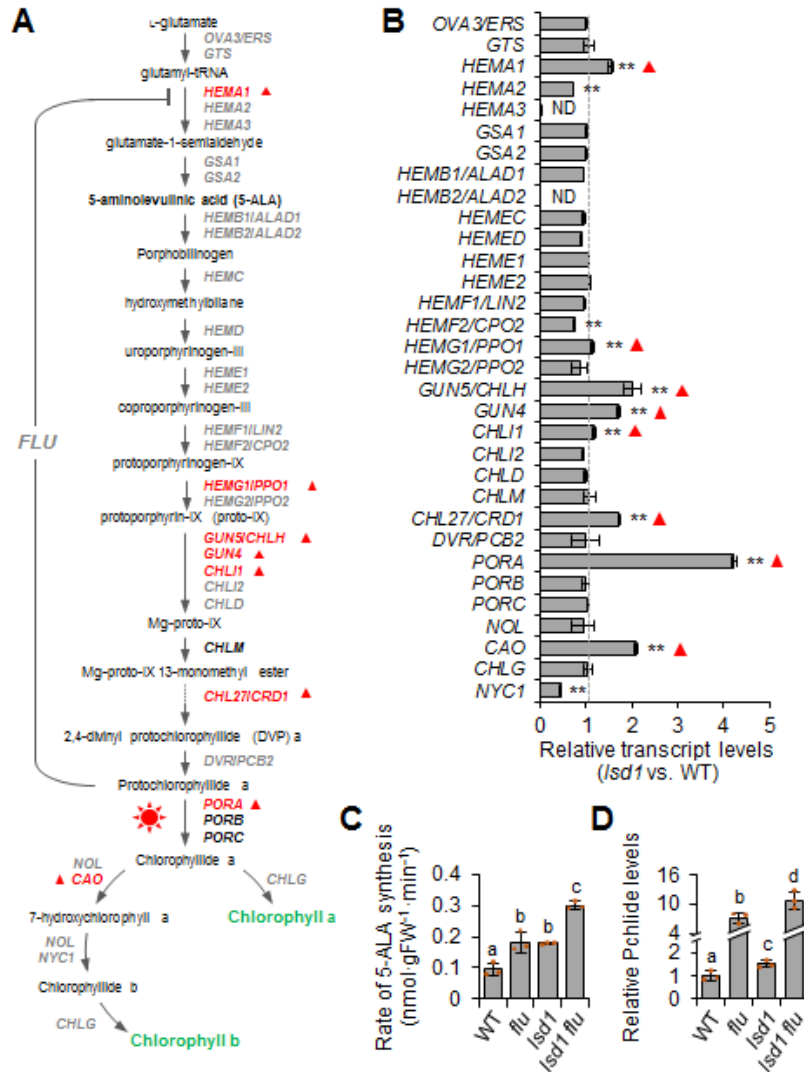

335

336 **Figure 4. *LSD1* mutation leads to the transcriptional upregulation of chlorophyll synthesis genes.**

337 (A) A schematic representation of the chlorophyll synthesis pathway.

338 (B) The expression levels of chlorophyll synthesis genes represented in (A) were obtained from our  
 339 previous study (Lv et al., 2019), and the relative transcript levels of chlorophyll synthesis genes in 17-d-  
 340 old CL-grown *lsd1* mutants compared to wild type (WT) are represented. Error bars indicate SD (n=3).  
 341 Asterisks indicate statistically significant differences ( $*P < 0.05$ ;  $**P < 0.01$ ) in the *lsd1* mutant  
 342 determined by Student's *t*-test relative to wild type. ND: non-detected. Red triangles in (A) and (B)  
 343 indicate the significantly upregulated genes in the *lsd1* mutant compared to WT.

344 (C) Levels of 5-ALA synthesis rate under CL conditions. The 5-ALA synthesis rate was measured in 16-  
 345 d-old plants of WT, *flu*, *lsd1*, and *lsd1 flu*.

346 (D) Relative levels of protochlorophyllide (Pchlride) in 10-d-old plants of WT, *flu*, *lsd1*, and *lsd1 flu*  
 347 grown under CL and then transferred to the dark for 8 hours. Values in (C) and (D) represent means  $\pm$   
 348 SD (n=3). Lowercase letters indicate significant differences between the indicated genotypes ( $P < 0.05$ ,  
 349 one-way ANOVA with posthoc Tukey's HSD test).

350 We then hypothesized that the SA-induced nuSIB1-GLK-driven upregulation of  
 351 PhANGs and the higher chlorophyll synthesis rate by *FLU* mutation might further

352 enhance  $^1\text{O}_2$  levels in chloroplasts in *lsd1 flu* plants grown under CL conditions before  
 353 the onset of RCD. Indeed, *lsd1 flu* double mutant plants exhibited accelerated RCD  
 354 than *lsd1* plants (Figure 5A), which was found to be radically reduced in *lsd1 flu ex1*,  
 355 indicating  $^1\text{O}_2$  was the prime cause of the reinforced RCD in *lsd1 flu*. This result  
 356 coincided with the intensity of maximum fluorescence of PSII (Fm) (Figure 5A), PSII  
 357 maximum efficiency (Fv/Fm) (Figure 5B), and the abundance of  $^1\text{O}_2$ -responsive genes  
 358 (SORGs) (Dogra et al., 2017) (Figure 5C).

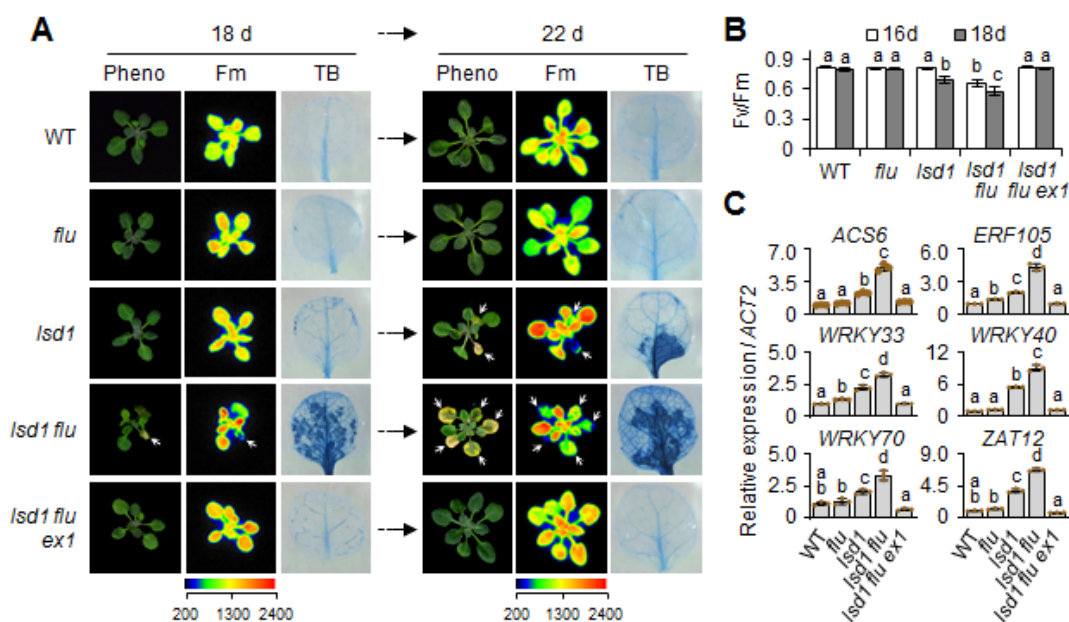

359  
 360 **Figure 5. Loss of LSD1 potentiates  $^1\text{O}_2$ -triggered EX1-dependent cell death in *flu* mutant.**  
 361 (A) WT, *flu*, *lsd1*, *lsd1 flu*, and *lsd1 flu ex1* plants were grown on Murashige and Skoog (MS) medium  
 362 under CL conditions ( $100 \mu\text{mol}\cdot\text{m}^{-2}\cdot\text{s}^{-1}$ ). The RCD phenotype (Pheno, left panels) and the chlorophyll  
 363 maximum fluorescence (Fm) of PSII (middle panel) were monitored in the whole plants at the indicated  
 364 time points. The dead cells in the first or second leaves from the genotypes were visualized via trypan  
 365 blue staining (right panel). Images are representative phenotypes.  
 366 (B) The first or second leaves from each genotype were harvested at the indicated time points to measure  
 367 the maximum photochemical efficiency of PSII (Fv/Fm). Data represent means  $\pm$  SD (n=10).  
 368 (C) Expression levels of selected  $^1\text{O}_2$ -responsive genes (SORGs) were examined by RT-qPCR in 18-d-  
 369 old plants. *ACT2* was used as an internal standard. Data represent means  $\pm$  SD (n=3). Lowercase letters  
 370 in (B) and (C) indicate statistically significant differences between mean values ( $P < 0.05$ , one-way  
 371 ANOVA with post-hoc Tukey's HSD test).

### 372 SA-induced SIB1 interrupts LSD1-GLK1 interaction

373 Since SIB1-mediated genomes uncoupled expression of PhANGs and PhAPGs largely  
 374 contributes to *lsd1* RCD via  $^1\text{O}_2$  signaling (Lv et al., 2019), we hypothesized that  
 375 nuSIB1 would counteractively modulate LSD1-GLK1 interaction to reinforce the

376 expression of PhANGs. Considering its rapid turnover via UPS (Li et al., 2020), nuSIB1  
377 may promptly intervene in this LSD1-GLK interaction, resulting in nuSIB1-GLK  
378 interaction and reinforced expression of PhANGs, thereby contributing to cell death  
379 (Lv et al., 2019). Alternatively, SA per se may interfere with LSD1-GLK interaction,  
380 for instance, through alteration of protein conformation of LSD1 or GLKs or both. In  
381 fact, a previous report showed a redox-sensitive reconfiguration of LSD1 and  
382 concurrent change of its interactome (Czarnocka et al., 2017). Thus, we examined how  
383 SA impacts the LSD1-GLK1 interaction in Arabidopsis leaf protoplasts isolated from  
384 WT and *sib1* mutant plants. The result that SA significantly hindered the LSD1-GLK1  
385 interaction in WT but not in *sib1* (Figure 6A) suggested that nuSIB1 rather than SA per  
386 se interrupts LSD1-GLK1 interaction. To further elucidate an antagonistic action of  
387 nuSIB1 towards LSD1-GLK1 interaction, a dose-dependent impact of nuSIB1 was  
388 examined. For this, LSD1-GFP and GLK1-Myc were transiently coexpressed in  
389 Arabidopsis leaf protoplasts, along with different amounts of free RFP or SIB1-RFP. It  
390 should be noted that increasing doses of RFP or SIB1-RFP reduce the expression of  
391 LSD1-GFP and GLK1-Myc, probably as a consequence of diminished transfection  
392 efficiency due to the presence of the additional constructs (Figure 6B). Nonetheless, the  
393 relative amount of GLK1-Myc protein co-immunoprecipitated with LSD1-GFP was  
394 quantified using ImageJ following immunoblot analysis (Figure 6C). The results  
395 showed a SIB1 dose-dependent inhibition of the LSD1-GLK1 interaction.



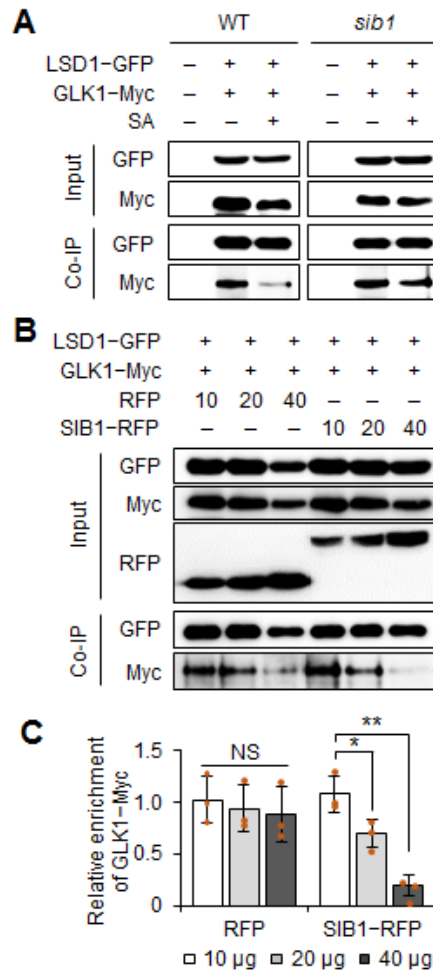

396

397 **Figure 6. SA-induced SIB1 intervenes in LSD1-GLK interaction.**

398 (A) The effect of the SA-induced nuSIB1 on the LSD1-GLK1 interaction. For Co-IP analyses,  
399 *35S:LSD1-GFP* and *35S:GLK1-Myc* were transiently coexpressed in Arabidopsis leaf protoplasts. The  
400 protoplasts were treated with either mock or 0.2 mM SA for 5 hours.

401 (B) The dose-dependent impact of SIB1 on the LSD1-GLK1 interaction. As indicated, *35S:LSD1-GFP*  
402 and *35S:GLK1-Myc* were coexpressed in Arabidopsis leaf protoplasts isolated from WT plants together  
403 with different amounts (10 μg, 20 μg, or 40 μg, respectively) of a plasmid containing either free *35S:RFP*  
404 or *35S:SIB1-RFP*. The subsequent Co-IP and immunoblot results are shown. Three independent  
405 experiments were conducted with similar results, and representative results are shown in (A) and (B).

406 (C) The signal intensity of eluted GLK1-Myc (from triplicate immunoblots in B) versus its input signal  
407 was quantified using the ImageJ software. Data are means ± SD (n=3). Asterisks denote statistically  
408 significant differences by Student's *t*-test (\**P* < 0.05, \*\**P* < 0.01, NS: not significant).

409 One possible scenario for the nuSIB1-dependent interruption of LSD1-GLK  
410 interaction is that SA-induced nuSIB1 may directly interact with LSD1, releasing  
411 GLK1 and GLK2 in the nucleus. The free GLK1/2 may interact with excess nuSIB1,  
412 promoting the expression of PhANGs. However, while the LSD1-LSD1 interaction was  
413 apparent, no interaction between LSD1 and nuSIB1 was observed (Supplemental  
414 Figure 7). Then we assumed that SA-induced nuSIB1 might compete with LSD1 to

415 bind to the PRD of GLK1 and GLK2. We then carried out Co-IP analyses to investigate  
416 if PRD is required for the interaction with SIB1. The result showed that the N-terminal  
417 region excluding all three domains is sufficient to interact with nuSIB1 (Supplemental  
418 Figure 8A and 8B). Since the N-terminal part contains a nuclear localization signal  
419 (Zhang et al., 2021a), we ended further defining the minimum length of the N-terminal  
420 necessitated for the interaction with nuSIB1. It is likely that SA-induced nuSIB1  
421 competitively interacts with GLK1 and GLK2 through the N-terminal part, which  
422 consequently enhances the expression of PhANGs and the  $^1\text{O}_2$  level, thereby activating  
423 an EX1-mediated cell death response (Figure 7). The rapid turnover of nuSIB1 via UPS  
424 (Li et al., 2020) might result in LSD1-GLK interaction and restore the expression levels  
425 of PhANGs.

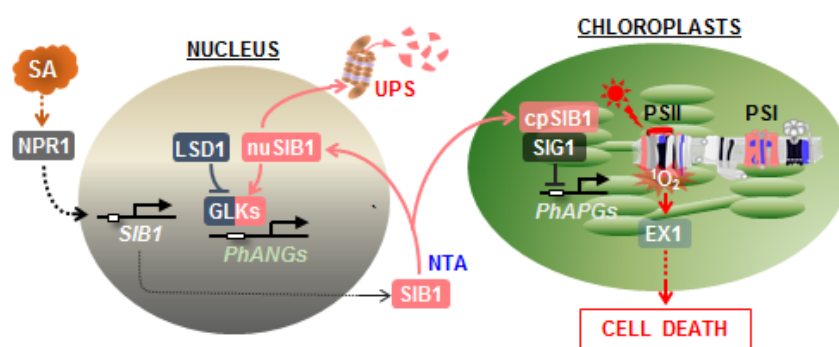

426  
427 **Figure 7. Proposed model elucidating the counteractive regulation of GLKs by LSD1 and nuSIB1.**  
428 LSD1-GLK interaction is required for negative regulation of GLK activity to fine-tune the expression of  
429 PhANGs, including LHCs and chlorophyll synthesis genes. Under SA-increasing stress conditions, the  
430 NPR1-induced and NTA-stabilized nuSIB1 intervenes in LSD1-GLK interaction to reinforce the  
431 expression of PhANGs, while the cpSIB1 represses the expression of PhAPGs by interacting with SIG1  
432 (Li et al., 2020; Lv et al., 2019; Morikawa et al., 2002). The resulting uncoupled expression of PhANGs  
433 and PhAPGs aggravates PSII photoinhibition and increases  $^1\text{O}_2$  level in chloroplasts, enabling EX1-  
434 mediated retrograde signaling to activate the expression of SORGs and cell death response (Kim et al.,  
435 2012; Lv et al., 2019). While NTA renders nuSIB1 more stable, UPS promotes the proteolysis of nuSIB1  
436 (Li et al., 2020), restoring LSD1-GLK interaction to avoid an excess of PhANG expression and  $^1\text{O}_2$   
437 accumulation. The counteractive regulation of GLKs by nuSIB1 and LSD1, along with post-translational  
438 regulation of nuSIB1 stability, seems vital to modulate  $^1\text{O}_2$  levels in chloroplasts during and after SA-  
439 increasing stress conditions.

## 440 DISCUSSION

441 Besides their essential role in chloroplast biogenesis and photosynthesis, multiple lines  
442 of evidence demonstrate that GLKs function in plant stress responses, evoking an

443 intriguing proposal that GLK may serve as a master switch in synchronously regulating  
444 photosynthesis and stress responses. We previously reported that the positive regulator  
445 of SA signaling and transcription coregulator nuSIB1 interacts with GLKs and  
446 WRKY33 to reinforce the expression of PhANGs and SA-responsive genes,  
447 respectively, upon an increase in cellular SA level (Li et al., 2020; Lv et al., 2019). On  
448 the contrary, cpSIB1 interacts with SIG1 polymerase to repress the expression of  
449 PhAPGs (Lv et al., 2019; Morikawa et al., 2002; Xie et al., 2010). The genomes-  
450 uncoupled expression of PhANGs and PhAPGs heightens the PSII photoinhibition,  
451 thereby escalating the highly reactive oxygen species, specifically  $^1\text{O}_2$ .  $^1\text{O}_2$  then  
452 contributes to SA-driven plant stress responses via EX1-mediated RS, which is shown  
453 to reinforce RCD phenotype in *lsd1* mutant (Dogra et al., 2019; Lv et al., 2019). Since  
454 the SA receptor NPR1 is required to induce the expression of *SIB1* (Xie et al., 2010),  
455 EX1-mediated  $^1\text{O}_2$  signaling is likely to be one of the downstream events led by SA and  
456 NPR1.

457 We now showed that LSD1 interacts with GLK1 and GLK2 TFs in the nucleus  
458 (Figure 1A). Besides their transcriptional regulation (e.g., by GUN1-mediated RS),  
459 multiple proteins post-translationally modulate GLK activity (Tang et al., 2016;  
460 Tokumaru et al., 2017; Zhang et al., 2021a). The C-terminal GCT-box drives GLK  
461 homo- or hetero-dimerization in maize (Rossini et al., 2001). The *turnip yellow mosaic*  
462 *virus* (TYMV) protein P69 binds to the GLK1/2 GCT-box, repressing PhANGs and  
463 chloroplast biogenesis in *Arabidopsis* (Ni et al., 2017). On the contrary,  
464 BRASSINOSTEROID INSENSITIVE 2 (BIN2)-dependent GLK phosphorylation  
465 promotes chloroplast biogenesis by stabilizing GLK proteins in *Arabidopsis* (Zhang et  
466 al., 2021a). These reports indicate that both DBD and GCT-box in GLK1/2 are involved  
467 in protein-protein interaction. Notably, the interdomain region of GLK1 and GLK2 are  
468 proline-enriched (Figure 2A; Supplemental Figure 2). Since proline residues provide  
469 protein-docking sites (Siligardi and Drake, 1995; Zarrinpar et al., 2003), we anticipated  
470 the PRD as an additional candidate domain required for the interaction with LSD1. The  
471 ensuing BiFC and Co-IP assays verified that the PRD is central for interacting with  
472 LSD1. GLK1 and GLK2 lacking DBD and GCT-box but retaining PRD interacted with  
473 LSD1, but complete loss of PRD abolished these interactions (Figure 2B and

474 2C). Besides, the association of GLK2 with the CUL4-DDB1-based E3 ligase complex  
475 promotes UPS-mediated GLK2 turnover in tomato (Tang et al., 2016). The COP1 and  
476 UPS-mediated GLK1 degradation was also reported in Arabidopsis plants with long-  
477 term abscisic acid (ABA) treatment (Lee et al., 2021). Interestingly, one latest work  
478 showed that WRKY75 directly represses *GLK* expression during leaf senescence  
479 (Zhang et al., 2021b). The ABA-induced SIB1 and its close homolog SIB2 interact with  
480 and inhibit WRKY75 activity, enabling the expression of GLKs in response to ABA.  
481 The antagonistic regulation of GLKs expression by SIB1/2 and WRKY75 was  
482 proposed to be essential in controlling ABA-mediated leaf senescence and seed  
483 germination. These findings by other groups and our data suggest that the GLKs are  
484 common targets of development or stress signaling to modulate chloroplast homeostasis.  
485 As emerging notion strongly supports the role of chloroplasts as environmental sensors,  
486 such modulation of GLK activity and stability would also significantly affect  
487 chloroplast-mediated plant stress responses.

488 Loss of LSD1 potentiated the expression of GLK target genes such as PhANGs  
489 (Supplemental Figure 5A and 5B) and increased the 5-ALA synthesis rate compared to  
490 WT plants (Figure 4C). Conversely, LSD1 overexpression repressed the expression of  
491 PhANGs (Figure 3A). These results were consistent with *oxLSD1* plant phenotypes  
492 exhibiting prematurely terminated chloroplast development and reduced LHCB levels  
493 (Figure 3B-3E). Consistently, LSD1 overexpression repressed GLK1 binding activity  
494 to its target promoters (Figure 3F). The effects of loss- and gain-of-function of LSD1  
495 towards the expression of GLK target genes also suggest a steady-state LSD1-GLK  
496 interaction in WT plants grown under normal growth conditions. Given that the  
497 elevated expression of PhANGs directed by nuSIB1-GLK interaction contributes to  
498 *lsd1* RCD (Lv et al., 2019), it was tempting to hypothesize that SA-induced nuSIB1  
499 interferes with LSD1-GLK interaction. Indeed, the Co-IP assay confirmed the negative  
500 impact of nuSIB1 accumulation on LSD1-GLK interaction (Figure 6). It has been  
501 shown that the PRD domain provides the sequence-specific docking site for interacting  
502 proteins without the requirement of a high-affinity interaction (Saraste and Musacchio,  
503 1994; Siligardi and Drake, 1995; Zarrinpar et al., 2003). The sequence-specific but low-  
504 affinity interaction at the proline-rich region might allow a highly reversible interaction  
505 between LSD1-GLKs, enabling SA-induced nuSIB1 to rapidly intervene in this  
506 interaction through the N-terminus of GLKs (Supplemental Figure 8). Such versatile

507 regulation of nuSIB1 stability and an antagonistic mode of action of nuSIB1 and LSD1  
508 towards GLK1/2 might be vital to maintain  $^1\text{O}_2$  homeostasis in chloroplasts and to  
509 induce SA-driven stress responses under fluctuating environmental conditions (Figure  
510 7).

511 Our findings also raise a plausible idea that GUN1-mediated RS would largely  
512 contribute to plant stress responses because the signaling primarily represses the  
513 expression of *GLK1* and *GLK2* once the foliar plastid function is interrupted (see  
514 introduction). Consistently, *gun1* mutant plants exhibit an increased susceptibility  
515 towards heat, water, drought, cold, and high-light stresses with enhanced cellular ROS  
516 levels (Cheng et al., 2011; Miller et al., 2007; Tang et al., 2014; Zhang et al., 2013;  
517 Zhang et al., 2011). The multifaceted interactions between GLK1/2 and the antagonistic  
518 modules nuSIB1 and LSD1, as well as other stress-related proteins, may be accountable  
519 for the altered *gun1* phenotype to various stress factors. The enhanced expression of  
520 *GLK1* and *GLK2* may increase the level of  $^1\text{O}_2$  if nuSIB1 is accumulated and intervene  
521 in LSD1-GLK interaction in *gun1*. The  $^1\text{O}_2$ -triggered EX1-mediated RS may then  
522 modulate plant stress responses in *gun1* mutant plants under SA-increasing stress  
523 conditions. In this regard, a new study of *gun1* may provide further insight into how  
524 chloroplast RS pathways mediated by GUN1 and EX1 coordinate SA-mediated plant  
525 stress responses through GLK1/2 and  $^1\text{O}_2$ , respectively.

## 526 **Methods**

### 527 **Plant materials and growth conditions**

528 The seeds used in this study were derived from *Arabidopsis thaliana* Columbia-0 (Col-  
529 0) ecotype and were harvested from plants grown under continuous light (CL; 100  
530  $\mu\text{mol}\cdot\text{m}^{-2}\cdot\text{s}^{-1}$ ) at  $22 \pm 2$  °C. Arabidopsis mutant seeds used in this study, including *lsd1-*  
531 *2* (SALK\_042687) (Lv et al., 2019), *glk1 glk2* (*Atglk1.1; Atglk2.1*) (Fitter et al., 2002),  
532 and *ex1* (SALK\_002088) (Lee et al., 2007) were obtained from the Nottingham  
533 Arabidopsis Stock Centre (NASC). *flu5c* has been described previously (Meskauskiene  
534 et al., 2001). The double and triple mutants in the *lsd1-2* background including *lsd1 flu*,  
535 *lsd1 flu ex1*, and *lsd1 glk1 glk2* were generated by crossing the homozygous plants. The

536 genotypes of all mutants were confirmed by PCR-based analyses. Primer sequences  
537 used for PCR are listed in Supplemental Table 1.

538 Seeds were surface sterilized with 70% (v/v) ethanol containing 0.05% (v/v) Triton  
539 X-100 (Sigma-Aldrich) for 10 min and washed five times with sterile distilled water.  
540 The sterile seeds were plated on Murashige and Skoog (MS) medium (Duchefa  
541 Biochemie) with 0.7% (w/v) agar (Duchefa Biochemie) and stratified at 4 °C in  
542 darkness for two days prior to placing in a growth chamber (CU-41L4; Percival  
543 Scientific) with CL condition.

#### 544 **Generation of *LSDI* overexpression lines**

545 The stop-codon-less *LSDI* coding sequence (CDS) was cloned into the modified  
546 pCAMBIA3300 binary vector containing the 35S promoter, a NcoI restriction site, and  
547 the *EGFP*. Arabidopsis stable transgenic lines were generated by a floral dip  
548 transformation procedure (Clough and Bent, 1998) with *Agrobacterium tumefaciens*  
549 strain GV3101. Homozygous transgenic lines were selected on MS medium containing  
550 12.5 mg/L glufosinate-ammonium (Sigma-Aldrich).

#### 551 **RNA extraction and RT-quantitative PCR (RT-qPCR)**

552 Total RNA was isolated from leaf tissues using the Spectrum Plant Total RNA Kit  
553 (Sigma-Aldrich) according to the manufacturer's instructions. The concentration of  
554 RNA was determined using the ultraviolet-visible spectrophotometer (NanoDrop™,  
555 Thermo Fisher Scientific), and the quality of RNA was evaluated by measuring the  
556 A260/A280 ratio. cDNA synthesis was performed with 1 µg of total RNA using the  
557 PrimeScript™ RT Reagent Kit (Takara) following the manufacturer's instructions. The  
558 RT-qPCR was performed on QuantStudio™ Flex Real-Time PCR System (Applied  
559 Biosystems) using iTaq Universal SYBR Green PCR master mix (Bio-Rad). The  
560 relative transcript level was calculated by the ddCt method (Livak and Schmittgen,  
561 2001) and normalized to the *ACTIN2* (AT3G18780) gene transcript level. The  
562 sequences of the primers used for RT-qPCR are listed in Supplemental Table 1.

### 563 Co-immunoprecipitation (Co-IP) assay

564 Co-IP assays were performed using *Nicotiana benthamiana* or Arabidopsis leaf  
565 protoplasts transiently coexpressed with the indicated combination of proteins. For the  
566 Co-IP assays in *N. benthamiana*, the *35S:LSD1-sGFP*, *35S:SIB1-sGFP*, *35S:GLK1-*  
567 *4×Myc*, and *35S:GLK2-4×Myc* constructs were created as described previously (Lv et  
568 al., 2019). Briefly, pDONR221/Zeo entry vector (Thermo Scientific) containing the  
569 stop codon-less full-length CDS of *LSD1*, *SIB1*, *GLK1*, or *GLK2* was recombined into  
570 the destination vector pGWB605 for C-terminal fusion with sGFP or into pGWB617  
571 for C-terminal fusion with 4×Myc through the Gateway LR reaction (Thermo  
572 Scientific). For the *35S:GLK1-4×Myc* (or *sGFP*) and *35S:GLK2-4×Myc* (or *sGFP*)  
573 constructs, a linker DNA encoding Gly-Gly-Ser-Gly-Gly-Ser was added between  
574 *4xMyc* (or *sGFP*) tag and GLK1 or GLK2 to increase conformational flexibility of the  
575 fusion protein as described previously (Tokumaru et al., 2017). The same procedures  
576 were used to create the constructs containing CDSs encoding domain-deleted or C-  
577 terminally truncated variants of GLK1 and GLK2. The different combinations of  
578 selected vectors were coexpressed in 4-week-old *Nicotiana benthamiana* leaves by  
579 Agrobacterium-mediated leaf infiltration as previously described by Boruc et al. (2010).  
580 For the Co-IP assays in Arabidopsis leaf protoplasts, the *35S:LSD1-sGFP*, *35S:GLK1-*  
581 *4×Myc*, *35S:SIB1-RFP*, and *35S:LSD1-RFP* were cloned into the pSAT6 vector (Tzfira  
582 et al., 2005). The isolation and transfection of Arabidopsis leaf protoplasts were  
583 performed as described previously (Yoo et al., 2007). The indicated combination of  
584 vectors was cotransfected into protoplasts ( $3 \times 10^6$ ) isolated from 4-week-old plants of  
585 WT or *sibl*.

586 Total protein was extracted using an IP buffer containing 50 mM Tris-HCl (pH  
587 7.5), 150 mM NaCl, 0.5mM EDTA, 10% (v/v) glycerol, 1% (v/v) Nonidet P-40 (NP-  
588 40), 1% deoxycholate, 0.1% (w/v) SDS, 1 × cComplete protease inhibitor cocktail  
589 (Roche), 1 mM PMSF, and 50 μM MG132. The protein extracts were incubated with  
590 20 μL of GFP-Trap magnetic agarose beads (GFP-TrapMA, Chromotek) for 2 h at 4 °C  
591 by vertical rotation (10 rpm). After incubation, the beads were washed five times with

592 the washing buffer containing 10 mM Tris-HCl (pH 7.5), 150 mM NaCl, 0.5 mM  
593 EDTA, 1 mM PMSF, 50  $\mu$ M MG132, and 1  $\times$  cOmplete protease inhibitor cocktail.  
594 The immunoprecipitated proteins were then eluted with 2  $\times$  SDS protein sample buffer  
595 [120 mM Tris-HCl (pH 6.8), 20% (v/v) glycerol, 4% (v/w) SDS, 0.04% (v/w)  
596 bromophenol blue, and 10% (v/v)  $\beta$ -mercaptoethanol] for 10 min at 95  $^{\circ}$ C. The eluates  
597 were subjected to 10% SDS-PAGE gels, and the interaction between coexpressed  
598 proteins was examined by immunoblot analyses using a mouse anti-Myc monoclonal  
599 antibody (1:10,000; Cell Signaling Technology), a rat anti-RFP monoclonal antibody  
600 (1:10,000; Chromotek), and a mouse anti-GFP monoclonal antibody (1:5,000; Roche).

#### 601 **Protein Extraction and immunoblot analysis**

602 Total proteins were extracted from 100 mg of foliar tissues with the IP buffer and  
603 quantified with a Pierce BCA protein assay kit (Thermo Fisher Scientific). Afterward,  
604 20  $\mu$ g total protein was separated on 10% SDS-PAGE gels and blotted onto Immun-  
605 Blot PVDF membrane (Bio-Rad). LSD1-GFP, LHCB1, and LHCB3 were  
606 immunochemically detected with mouse anti-GFP (1:10,000; Roche), rabbit anti-  
607 LHCB1 (1:5,000; Agrisera), and rabbit anti-LHCB3 (1:5,000; Agrisera) antibodies,  
608 respectively. The UDP-glucose pyrophosphorylase (UGPase) detected with rabbit anti-  
609 UGPase (1:3,000; Agrisera) was used as a loading control.

#### 610 **Confocal laser-scanning microscopy**

611 The GFP, YFP, chlorophyll, and 4', 6'-diamidino-2-phenylindole (DAPI) fluorescence  
612 signals were detected by confocal laser-scanning microscopy analysis using TCS SP8  
613 (Leica Microsystems). All the images were obtained and processed with Leica LAS AF  
614 Lite software, version 2.6.3 (Leica Microsystems).

#### 615 **Bimolecular fluorescence complementation (BiFC) assay**

616 BiFC assays were conducted with a split-YFP system in *N. benthamiana* leaves, as  
617 described previously (Lee et al., 2020; Lu et al., 2010). Briefly, the pDONR/Zeo entry  
618 vectors (Thermo Fisher Scientific) containing CDSs lacking the termination codon of  
619 intact forms, domain-deleted, or C-terminally truncated variants of GLK1 and GLK2



620 were recombined into the destination vector pGTQL1221 through Gateway LR reaction.  
621 The same procedure was done to recombine the pDONR221/ZEO entry vector  
622 containing the *LSD1* CDS lacking the terminal codon into the pGTQL1211. For the  
623 BiFC assay, *A. tumefaciens* mixtures carrying the appropriate constructs were  
624 infiltrated into 4-week-old *N. benthamiana* leaves. The presence of YFP fluorescence  
625 signals was evaluated by confocal laser-scanning microscopy analysis.

#### 626 **ChIP-qPCR assays**

627 ChIP assays were performed using Arabidopsis leaf protoplasts as described previously  
628 (Lee et al., 2017; Lv et al., 2019; Yoo et al., 2007). Briefly, 1 mg of pSAT6 vectors  
629 containing *35S:GLK1-4×Myc* DNA were transfected with or without pSAT6 vector  
630 containing *35S:LSD1-RFP* DNA into Arabidopsis leaf protoplasts ( $2 \times 10^7$ ) isolated  
631 from 4-week-old *lsd1 glk1 glk2* triple mutant plants grown under 10-h light/14-h dark  
632 conditions at a light intensity of  $100 \mu\text{mol m}^{-2}\text{s}^{-1}$ . Afterward, the protoplasts were  
633 incubated at 24 °C for 16 h under dim light conditions. The protoplast chromatin was  
634 crosslinked by 1% (v/v) formaldehyde in  $1 \times$  PBS (pH 7.4) for 10 min and quenched  
635 with 0.1 M glycine for 5 min. After isolating nuclei from the protoplasts, the chromatin  
636 was sheared by sonication into an average size of around 500 bp. The lysates were  
637 diluted with  $10 \times$  ChIP dilution buffer [1% (v/v) Triton X-100, 2 mM EDTA, 20 mM  
638 Tris-HCl (pH 8.0), 150 mM NaCl, 50  $\mu\text{M}$  MG132, 1 mM PMSF, and  $1 \times$  protease  
639 inhibitor cocktail] and precleared by incubation with 50  $\mu\text{L}$  Protein-A agarose  
640 beads/Salmon sperm DNA (Millipore) at 4 °C for 1 h. The samples were then incubated  
641 with anti-Myc monoclonal antibodies (1:10,000; Cell Signaling Technology) at 4 °C  
642 overnight. To determine non-specific binding of DNA on beads, ChIP assays were also  
643 performed without antibodies. After washing the beads, the immunocomplexes were  
644 eluted with elution buffer containing 1% (w/v) SDS and 100 mM  $\text{NaHCO}_3$ . The eluates  
645 were treated with proteinase K for 1 h at 37 °C after reverse cross-linking. The bound  
646 DNA fragments were purified as previously described by Lee et al. (2017) and  
647 precipitated with ethanol in the presence of glycogen. The purified DNA was dissolved  
648 in water. qPCR analyses were performed on bound and input DNAs. The primers for

649 each tested gene are listed in Supplemental Table 1. The amount of DNA enriched by  
650 the anti-Myc antibody was calculated in comparison with the respective input DNA  
651 used for each ChIP analysis. Afterward, the enrichment was calculated by normalizing  
652 against the corresponding control sample (without antibody).

### 653 **Production of recombinant proteins**

654 To produce recombinant proteins of LSD1, GLK1, and GLK2, the coding sequences  
655 (CDS) of genes were cloned into the modified pET21b (Novagen) expression vector  
656 after adding a cleavage site for the tobacco etch virus (TEV) protease to the 5' end of  
657 the CDSs. The recombinant proteins with a cleavable N-terminal 10×His-MsyB tag  
658 were expressed in *E. coli* BL21 (DE3). After culturing the cells at 37 °C until an OD<sub>600</sub>  
659 of 0.6, recombinant proteins were induced by adding 0.3 mM isopropyl-β-D-  
660 thiogalactopyranoside (IPTG) for 12 h at 16 °C. Cells were pelleted by centrifugation  
661 and resuspended with buffer A [(50 mM Tris (pH 8.0), 200 mM NaCl, and 1 mM  
662 PMSF)]. The cells were lysed by high-pressure homogenizer at 600-800 bar and then  
663 centrifuged at 17,000 rpm for 50 min. Each soluble fraction was passed over a Ni-NTA  
664 column (Novagen) and eluted with buffer containing 25 mM Tris (pH 8.0), 200 mM  
665 NaCl, and 200 mM Imidazole. Subsequently, the eluates containing recombinant  
666 proteins with 10×His-MsyB tag were further purified by an anion-exchange column  
667 (Source-15Q; GE Healthcare). The 10×His-MsyB tag was cleaved by TEV protease at  
668 4 °C overnight and removed by an anion-exchange column. Untagged recombinant  
669 proteins were then concentrated and further purified by size-exclusion chromatography  
670 (Superdex 200 Increase10/300 GL; GE Healthcare) in buffer containing 20 mM Tris  
671 (pH 8.0), 200 mM NaCl, and 3 mM DTT. The peak fractions of each protein were  
672 pooled together and used for gel filtration assay.

### 673 **Gel filtration assay**

674 The recombinant proteins purified as described above were subjected to gel filtration  
675 assay (Superdex 200 Increase10/300 GL; GE Healthcare) in buffer containing 20 mM  
676 Tris (pH 8.0), 200 mM NaCl, and 3 mM DTT. A mixture of the purified LSD1 and

677 GLK1 (or GLK2) proteins was incubated at 4 °C for 1 h before gel filtration. Samples  
678 from relevant fractions were applied to SDS-PAGE and visualized by Coomassie blue  
679 staining.

#### 680 **Measuring 5-ALA synthesis rate**

681 The 5-ALA synthesis rate was quantified as previously described (Goslings et al., 2004).  
682 CL-grown 16-day-old plants of WT, *flu*, *lsd1*, and *lsd1 flu* were vacuum-infiltrated for  
683 5 min with an 80 mM levulinic acid (Sigma) solution containing 10mM KH<sub>2</sub>PO<sub>4</sub> (pH  
684 7.2) and 0.5% (v/v) Tween 20. After 1 hour incubation at room temperature under CL,  
685 samples were immediately frozen in liquid nitrogen and then homogenized in 4% (v/v)  
686 TCA. The homogenates were lysed at 95 °C for 15 min, cooled on ice for 2 min, and  
687 filtrated with 0.45 µm cellulose acetate membrane filters (Sterlitech). The filtrated  
688 lysates were neutralized with an equal volume of 0.5 M NaH<sub>2</sub>PO<sub>4</sub> (pH 7.5). Afterward,  
689 ethylacetoacetate (1/5) was added and then the samples were incubated at 95 °C for 10  
690 min. After cooling on ice for 5 min, the extracts were mixed with the same volume of  
691 fresh Ehrlich's reagent [0.2 g *p*-dimethylaminobenzaldehyde (Sigma-Aldrich), 8.4 mL  
692 acetic acid, and 1.6 mL 70% (v/v) perchloric acid (Sigma-Aldrich)] and centrifuged at  
693 14,000 g for 5 min at 4 °C. The OD of each supernatant was measured at 553 nm using  
694 the NanoDrop 2000 (Thermo Fisher Scientific). The amount of 5-ALA was calculated  
695 using a coefficient of  $7.45 \times 10^4 \text{ mol}^{-1} \text{ cm}^{-1}$ .

#### 696 **Determining photochemical efficiency**

697 Measurements of photochemical efficiency of PSII (Fv/Fm) were conducted with a  
698 FluorCam system (FC800-C/1010GFP; Photon Systems Instruments) containing a  
699 CCD camera and an irradiation system according to the instrument manufacturer's  
700 instructions.

#### 701 **Trypan blue staining**

702 Cell death was determined by trypan blue (TB) staining as described previously (Lv et  
703 al., 2019). The plant tissues were submerged in TB staining solution [25% (v/v) phenol,  
704 25% (v/v) glycerol, 25% (v/v) lactic acid, 0.05% (w/v) trypan blue] diluted with ethanol

705 1:2 (v/v) and boiled for 2 min. After incubating for 16 h on a vertical shaker at room  
706 temperature, the non-specific staining was removed using destaining solution (250 g  
707 chloral hydrate dissolved in 100 ml H<sub>2</sub>O, pH 1.2). Plant tissues were then kept in 50%  
708 (v/v) glycerol before taking images.

#### 709 **Gene ontology (GO) enrichment analysis**

710 The individual RNA-seq data using the *lsd1* and *glk1 glk2*, as analyzed in Supplemental  
711 Figure 5A, were previously published by Li et al. (Lv et al., 2019) and Ni *et al.* (Ni et  
712 al., 2017), respectively. The GO enrichment analysis of the selected genes shown in  
713 Supplemental Dataset 5 was performed on gprofiler (<https://biit.cs.ut.ee/gprofiler>) and  
714 represented the significantly enriched GO terms in the data set of biological processes  
715 (BP) with a significance of *P*-value < 0.05.

#### 716 **Pigment analysis**

717 The level of Pchlide was measured in 10-day-old plants of WT, *flu*, *lsd1*, and *lsd1 flu*  
718 as described by Goslings *et al.* (Goslings et al., 2004).

#### 719 **FUNDING**

720 This research was supported by the Strategic Priority Research Program from the  
721 Chinese Academy of Sciences (Grant No. XDB27040102), the 100-Talent Program of  
722 the Chinese Academy of Sciences, and the National Natural Science Foundation of  
723 China (NSFC) (Grant No. 31871397) to C.K..

#### 724 **AUTHOR CONTRIBUTIONS**

725 M.L., K.P.L., T.L., V.D., W.X., and C.K. designed the experiments. M.L., K.P.L., T.L.,  
726 V.D., J.D., and M.S.L. performed the experiments. M.L., K.P.L., T.L., V.D., W.X., and  
727 C.K. analyzed the data. C.K. wrote the manuscript with significant contributions from  
728 M.L and K.P.L. All authors discussed the results and reviewed the manuscript.

#### 729 **ACKNOWLEDGMENTS**

730 We thank the Core Facility of Proteomics in Shanghai Center for Plant Stress Biology  
731 (PSC) for carrying out mass spectrometry. No conflict of interest declared.

## 732 REFERENCES

- 733 **Aviv, D.H., Rusterucci, C., Holt, B.F., 3rd, Dietrich, R.A., Parker, J.E., and Dangl,**  
734 **J.L.** (2002). Runaway cell death, but not basal disease resistance, in *lsd1* is SA- and  
735 NIM1/NPR1-dependent. *Plant J* **29**:381-391.
- 736 **Beale, S.I., and Castelfranco, P.A.** (1974). The Biosynthesis of delta-Aminolevulinic  
737 Acid in Higher Plants: I. Accumulation of delta-Aminolevulinic Acid in Greening Plant  
738 Tissues. *Plant Physiol* **53**:291-296.
- 739 **Boruc, J., Van den Daele, H., Hollunder, J., Rombauts, S., Mylle, E., Hilson, P.,**  
740 **Inze, D., De Veylder, L., and Russinova, E.** (2010). Functional modules in the  
741 Arabidopsis core cell cycle binary protein-protein interaction network. *Plant Cell*  
742 **22**:1264-1280.
- 743 **Bravo-Garcia, A., Yasumura, Y., and Langdale, J.A.** (2009). Specialization of the  
744 Golden2-like regulatory pathway during land plant evolution. *New Phytol* **183**:133-141.
- 745 **Chai, T., Zhou, J., Liu, J., and Xing, D.** (2015). LSD1 and HY5 antagonistically  
746 regulate red light induced-programmed cell death in Arabidopsis. *Front Plant Sci* **6**:292.
- 747 **Chan, K.X., Phua, S.Y., Crisp, P., McQuinn, R., and Pogson, B.J.** (2016). Learning  
748 the Languages of the Chloroplast: Retrograde Signaling and Beyond. *Annu Rev Plant*  
749 *Biol* **67**:25-53.
- 750 **Cheng, J., He, C.X., Zhang, Z.W., Xu, F., Zhang, D.W., Wang, X., Yuan, S., and**  
751 **Lin, H.H.** (2011). Plastid signals confer Arabidopsis tolerance to water stress. *Z*  
752 *Naturforsch C* **66**:47-54.
- 753 **Clough, S.J., and Bent, A.F.** (1998). Floral dip: a simplified method for  
754 Agrobacterium-mediated transformation of Arabidopsis thaliana. *Plant J* **16**:735-743.
- 755 **Czarnocka, W., Van Der Kelen, K., Willems, P., Szechynska-Hebda, M.,**  
756 **Shahnejat-Bushehri, S., Balazadeh, S., Rusaczek, A., Mueller-Roeber, B., Van**  
757 **Breusegem, F., and Karpinski, S.** (2017). The dual role of LESION SIMULATING  
758 DISEASE 1 as a condition-dependent scaffold protein and transcription regulator. *Plant*  
759 *Cell Environ* **40**:2644-2662.
- 760 **Dietrich, R.A., Richberg, M.H., Schmidt, R., Dean, C., and Dangl, J.L.** (1997). A  
761 novel zinc finger protein is encoded by the Arabidopsis LSD1 gene and functions as a  
762 negative regulator of plant cell death. *Cell* **88**:685-694.
- 763 **Dietrich, R.A., Delaney, T.P., Uknes, S.J., Ward, E.R., Ryals, J.A., and Dangl, J.L.**  
764 (1994). Arabidopsis mutants simulating disease resistance response. *Cell* **77**:565-577.
- 765 **Dogra, V., Li, M., Singh, S., Li, M., and Kim, C.** (2019). Oxidative post-translational  
766 modification of EXECUTER1 is required for singlet oxygen sensing in plastids. *Nat*  
767 *Commun* **10**:2834.
- 768 **Dogra, V., Duan, J., Lee, K.P., Lv, S., Liu, R., and Kim, C.** (2017). FtsH2-Dependent  
769 Proteolysis of EXECUTER1 Is Essential in Mediating Singlet Oxygen-Triggered  
770 Retrograde Signaling in Arabidopsis thaliana. *Front Plant Sci* **8**:1145.

- 771 **Fitter, D.W., Martin, D.J., Copley, M.J., Scotland, R.W., and Langdale, J.A.**  
772 (2002). GLK gene pairs regulate chloroplast development in diverse plant species. *Plant*  
773 *J* **31**:713-727.
- 774 **Forreiter, C., and Apel, K.** (1993). Light-independent and light-dependent  
775 protochlorophyllide-reducing activities and two distinct NADPH-protochlorophyllide  
776 oxidoreductase polypeptides in mountain pine (*Pinus mugo*). *Planta* **190**:536-545.
- 777 **Goslings, D., Meskauskiene, R., Kim, C., Lee, K.P., Nater, M., and Apel, K.** (2004).  
778 Concurrent interactions of heme and FLU with Glu tRNA reductase (HEMA1), the  
779 target of metabolic feedback inhibition of tetrapyrrole biosynthesis, in dark- and light-  
780 grown *Arabidopsis* plants. *Plant J* **40**:957-967.
- 781 **Han, X.Y., Li, P.X., Zou, L.J., Tan, W.R., Zheng, T., Zhang, D.W., and Lin, H.H.**  
782 (2016). GOLDEN2-LIKE transcription factors coordinate the tolerance to Cucumber  
783 mosaic virus in *Arabidopsis*. *Biochem Biophys Res Commun* **477**:626-632.
- 784 **Hou, Z., Yang, Y., Hedtke, B., and Grimm, B.** (2019). Fluorescence in blue light  
785 (FLU) is involved in inactivation and localization of glutamyl-tRNA reductase during  
786 light exposure. *Plant J* **97**:517-529.
- 787 **Huang, X., Li, Y., Zhang, X., Zuo, J., and Yang, S.** (2010). The *Arabidopsis* LSD1  
788 gene plays an important role in the regulation of low temperature-dependent cell death.  
789 *New Phytol* **187**:301-312.
- 790 **Jabs, T., Dietrich, R.A., and Dangl, J.L.** (1996). Initiation of runaway cell death in  
791 an *Arabidopsis* mutant by extracellular superoxide. *Science* **273**:1853-1856.
- 792 **Karpinski, S., Szechynska-Hebda, M., Wituszynska, W., and Burdiak, P.** (2013).  
793 Light acclimation, retrograde signalling, cell death and immune defences in plants.  
794 *Plant Cell Environ* **36**:736-744.
- 795 **Kim, C., Meskauskiene, R., Zhang, S., Lee, K.P., Lakshmanan Ashok, M.,**  
796 **Blajecka, K., Herrfurth, C., Feussner, I., and Apel, K.** (2012). Chloroplasts of  
797 *Arabidopsis* are the source and a primary target of a plant-specific programmed cell  
798 death signaling pathway. *Plant Cell* **24**:3026-3039.
- 799 **Koussevitzky, S., Nott, A., Mockler, T.C., Hong, F., Sachetto-Martins, G., Surpin,**  
800 **M., Lim, J., Mittler, R., and Chory, J.** (2007). Signals from chloroplasts converge to  
801 regulate nuclear gene expression. *Science* **316**:715-719.
- 802 **Lai, Z., Li, Y., Wang, F., Cheng, Y., Fan, B., Yu, J.Q., and Chen, Z.** (2011).  
803 *Arabidopsis* sigma factor binding proteins are activators of the WRKY33 transcription  
804 factor in plant defense. *Plant Cell* **23**:3824-3841.
- 805 **Lee, J., Choi, B., Yun, A., Son, N., Ahn, G., Cha, J.Y., Kim, W.Y., and Hwang, I.**  
806 (2021). Long-term abscisic acid promotes golden2-like1 degradation through  
807 constitutive photomorphogenic 1 in a light intensity-dependent manner to suppress  
808 chloroplast development. *Plant Cell Environ* **44**:3034-3048.
- 809 **Lee, J.H., Jin, S., Kim, S.Y., Kim, W., and Ahn, J.H.** (2017). A fast, efficient  
810 chromatin immunoprecipitation method for studying protein-DNA binding in  
811 *Arabidopsis* mesophyll protoplasts. *Plant Methods* **13**:42.
- 812 **Lee, K.P., Kim, C., Landgraf, F., and Apel, K.** (2007). EXECUTER1- and  
813 EXECUTER2-dependent transfer of stress-related signals from the plastid to the  
814 nucleus of *Arabidopsis thaliana*. *Proc Natl Acad Sci U S A* **104**:10270-10275.

- 815 **Lee, K.P., Liu, K., Kim, E.Y., Medina-Puche, L., Dong, H., Duan, J., Li, M., Dogra,**  
816 **V., Li, Y., Lv, R., et al.** (2020). PLANT NATRIURETIC PEPTIDE A and Its Putative  
817 Receptor PNP-R2 Antagonize Salicylic Acid-Mediated Signaling and Cell Death. *Plant*  
818 *Cell* **32**:2237-2250.
- 819 **Li, Z., Dogra, V., Lee, K.P., Li, R., Li, M., Li, M., and Kim, C.** (2020). N-Terminal  
820 Acetylation Stabilizes SIGMA FACTOR BINDING PROTEIN1 Involved in Salicylic  
821 Acid-Primed Cell Death. *Plant Physiol* **183**:358-370.
- 822 **Livak, K.J., and Schmittgen, T.D.** (2001). Analysis of relative gene expression data  
823 using real-time quantitative PCR and the 2(-Delta Delta C(T)) Method. *Methods*  
824 **25**:402-408.
- 825 **Lu, Q., Tang, X., Tian, G., Wang, F., Liu, K., Nguyen, V., Kohalmi, S.E., Keller,**  
826 **W.A., Tsang, E.W., Harada, J.J., et al.** (2010). Arabidopsis homolog of the yeast  
827 TREX-2 mRNA export complex: components and anchoring nucleoporin. *Plant J*  
828 **61**:259-270.
- 829 **Lv, R., Li, Z., Li, M., Dogra, V., Lv, S., Liu, R., Lee, K.P., and Kim, C.** (2019).  
830 Uncoupled Expression of Nuclear and Plastid Photosynthesis-Associated Genes  
831 Contributes to Cell Death in a Lesion Mimic Mutant. *Plant Cell* **31**:210-230.
- 832 **Martin, G., Leivar, P., Ludevid, D., Tepperman, J.M., Quail, P.H., and Monte, E.**  
833 (2016). Phytochrome and retrograde signalling pathways converge to antagonistically  
834 regulate a light-induced transcriptional network. *Nat Commun* **7**:11431.
- 835 **Meskauskiene, R., Nater, M., Goslings, D., Kessler, F., op den Camp, R., and Apel,**  
836 **K.** (2001). FLU: a negative regulator of chlorophyll biosynthesis in Arabidopsis  
837 thaliana. *Proc Natl Acad Sci U S A* **98**:12826-12831.
- 838 **Miller, G., Suzuki, N., Rizhsky, L., Hegie, A., Koussevitzky, S., and Mittler, R.**  
839 (2007). Double mutants deficient in cytosolic and thylakoid ascorbate peroxidase reveal  
840 a complex mode of interaction between reactive oxygen species, plant development,  
841 and response to abiotic stresses. *Plant Physiol* **144**:1777-1785.
- 842 **Morikawa, K., Shiina, T., Murakami, S., and Toyoshima, Y.** (2002). Novel nuclear-  
843 encoded proteins interacting with a plastid sigma factor, Sig1, in Arabidopsis thaliana.  
844 *FEBS Lett* **514**:300-304.
- 845 **Muhlenbock, P., Plaszczyca, M., Plaszczyca, M., Mellerowicz, E., and Karpinski,**  
846 **S.** (2007). Lysigenous aerenchyma formation in Arabidopsis is controlled by LESION  
847 SIMULATING DISEASE1. *Plant Cell* **19**:3819-3830.
- 848 **Muhlenbock, P., Szechynska-Hebda, M., Plaszczyca, M., Baudo, M., Mateo, A.,**  
849 **Mullineaux, P.M., Parker, J.E., Karpinska, B., and Karpinski, S.** (2008).  
850 Chloroplast signaling and LESION SIMULATING DISEASE1 regulate crosstalk  
851 between light acclimation and immunity in Arabidopsis. *Plant Cell* **20**:2339-2356.
- 852 **Murmu, J., Wilton, M., Allard, G., Pandeya, R., Desveaux, D., Singh, J., and**  
853 **Subramaniam, R.** (2014). Arabidopsis GOLDEN2-LIKE (GLK) transcription factors  
854 activate jasmonic acid (JA)-dependent disease susceptibility to the biotrophic pathogen  
855 *Hyaloperonospora arabidopsidis*, as well as JA-independent plant immunity against the  
856 necrotrophic pathogen *Botrytis cinerea*. *Mol Plant Pathol* **15**:174-184.

- 857 **Nandi, D.L., and Shemin, D.** (1968). Delta-aminolevulinic acid dehydratase of  
858 *Rhodospseudomonas spheroides*. 3. Mechanism of porphobilinogen synthesis. *J Biol*  
859 *Chem* **243**:1236-1242.
- 860 **Ni, F., Wu, L., Wang, Q., Hong, J., Qi, Y., and Zhou, X.** (2017). Turnip Yellow  
861 Mosaic Virus P69 Interacts with and Suppresses GLK Transcription Factors to Cause  
862 Pale-Green Symptoms in *Arabidopsis*. *Mol Plant* **10**:764-766.
- 863 **Nott, A., Jung, H.S., Koussevitzky, S., and Chory, J.** (2006). Plastid-to-nucleus  
864 retrograde signaling. *Annu Rev Plant Biol* **57**:739-759.
- 865 **Rossini, L., Cribb, L., Martin, D.J., and Langdale, J.A.** (2001). The maize golden2  
866 gene defines a novel class of transcriptional regulators in plants. *Plant Cell* **13**:1231-  
867 1244.
- 868 **Rusaczonok, A., Czarnocka, W., Kacprzak, S., Witon, D., Slesak, I., Szechynska-**  
869 **Hebda, M., Gawronski, P., and Karpinski, S.** (2015). Role of phytochromes A and  
870 B in the regulation of cell death and acclimatory responses to UV stress in *Arabidopsis*  
871 *thaliana*. *J Exp Bot* **66**:6679-6695.
- 872 **Saraste, M., and Musacchio, A.** (1994). Backwards and forwards binding. *Nat Struct*  
873 *Biol* **1**:835-837.
- 874 **Savitch, L.V., Subramaniam, R., Allard, G.C., and Singh, J.** (2007). The GLK1  
875 'regulon' encodes disease defense related proteins and confers resistance to *Fusarium*  
876 *graminearum* in *Arabidopsis*. *Biochem Biophys Res Commun* **359**:234-238.
- 877 **Siligardi, G., and Drake, A.F.** (1995). The importance of extended conformations and,  
878 in particular, the PII conformation for the molecular recognition of peptides.  
879 *Biopolymers* **37**:281-292.
- 880 **Tang, H., Zhang, D., Yuan, S., Zhu, F., F., X., Fu, F.Q., Wang, S., and Lin, H.H.**  
881 (2014). Plastid signals induce ALTERNATIVE OXIDASE expression to enhance the  
882 cold stress tolerance in *Arabidopsis thaliana*. *Plant Growth Regul* **74**:275-283.
- 883 **Tang, X., Miao, M., Niu, X., Zhang, D., Cao, X., Jin, X., Zhu, Y., Fan, Y., Wang,**  
884 **H., Liu, Y., et al.** (2016). Ubiquitin-conjugated degradation of golden 2-like  
885 transcription factor is mediated by CUL4-DDB1-based E3 ligase complex in tomato.  
886 *New Phytol* **209**:1028-1039.
- 887 **Tokumar, M., Adachi, F., Toda, M., Ito-Inaba, Y., Yazu, F., Hirose, Y.,**  
888 **Sakakibara, Y., Suiko, M., Kakizaki, T., and Inaba, T.** (2017). Ubiquitin-  
889 Proteasome Dependent Regulation of the GOLDEN2-LIKE 1 Transcription Factor in  
890 Response to Plastid Signals. *Plant Physiol* **173**:524-535.
- 891 **Tzfira, T., Tian, G.W., Lacroix, B., Vyas, S., Li, J., Leitner-Dagan, Y., Krichevsky,**  
892 **A., Taylor, T., Vainstein, A., and Citovsky, V.** (2005). pSAT vectors: a modular  
893 series of plasmids for autofluorescent protein tagging and expression of multiple genes  
894 in plants. *Plant Mol Biol* **57**:503-516.
- 895 **Waters, M.T., Moylan, E.C., and Langdale, J.A.** (2008). GLK transcription factors  
896 regulate chloroplast development in a cell-autonomous manner. *Plant J* **56**:432-444.
- 897 **Waters, M.T., Wang, P., Korkaric, M., Capper, R.G., Saunders, N.J., and**  
898 **Langdale, J.A.** (2009). GLK transcription factors coordinate expression of the  
899 photosynthetic apparatus in *Arabidopsis*. *Plant Cell* **21**:1109-1128.



900 **Xie, Y.D., Li, W., Guo, D., Dong, J., Zhang, Q., Fu, Y., Ren, D., Peng, M., and Xia,**  
901 **Y.** (2010). The Arabidopsis gene SIGMA FACTOR-BINDING PROTEIN 1 plays a  
902 role in the salicylate- and jasmonate-mediated defence responses. *Plant Cell Environ*  
903 **33**:828-839.

904 **Yoo, S.D., Cho, Y.H., and Sheen, J.** (2007). Arabidopsis mesophyll protoplasts: a  
905 versatile cell system for transient gene expression analysis. *Nat Protoc* **2**:1565-1572.

906 **Zarrinpar, A., Bhattacharyya, R.P., and Lim, W.A.** (2003). The structure and  
907 function of proline recognition domains. *Sci STKE* **2003**:RE8.

908 **Zhang, D., Tan, W., Yang, F., Han, Q., Deng, X., Guo, H., Liu, B., Yin, Y., and Lin,**  
909 **H.** (2021a). A BIN2-GLK1 Signaling Module Integrates Brassinosteroid and Light  
910 Signaling to Repress Chloroplast Development in the Dark. *Dev Cell* **56**:310-324 e317.

911 **Zhang, H., Zhang, L., Ji, Y., Jing, Y., Li, L., Chen, Y., Wang, R., Zhang, H., Yu,**  
912 **D., and Chen, L.** (2021b). Arabidopsis SIGMA FACTOR BINDING PROTEINS  
913 function antagonistically to WRKY75 in abscisic acid-mediated leaf senescence and  
914 seed germination. *J Exp Bot*:erab391.

915 **Zhang, Z.W., Yuan, S., Xu, F., Yang, H., Chen, Y.E., Yuan, M., Xu, M.Y., Xue,**  
916 **L.W., Xu, X.C., and Lin, H.H.** (2011). Mg-protoporphyrin, haem and sugar signals  
917 double cellular total RNA against herbicide and high-light-derived oxidative stress.  
918 *Plant Cell Environ* **34**:1031-1042.

919 **Zhang, Z.W., Feng, L.Y., Cheng, J., Tang, H., Xu, F., Zhu, F., Zhao, Z.Y., Yuan,**  
920 **M., Chen, Y.E., Wang, J.H., et al.** (2013). The roles of two transcription factors, ABI4  
921 and CBFA, in ABA and plastid signalling and stress responses. *Plant Mol Biol* **83**:445-  
922 458.

923

924

925

926

927

928

929

930

931

932

933

934

935

936

937 **SUPPLEMENTAL INFORMATION**

938 **SUPPLEMENTAL FIGURES**

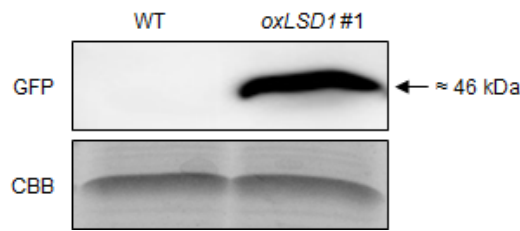

939 **Supplemental Figure 1. Detection of the LSD1-GFP fusion protein.**

940 Total proteins were extracted from two-week-old plants of WT and *35S:LSD1-GFP* transgenic line  
 941 (*oxLSD1*) grown under CL. The proteins were subjected to an immunoblot assay to detect the LSD1-  
 942 GFP fusion protein using an anti-GFP antibody. Denaturing gel stained with Coomassie brilliant blue  
 943 (CBB) was used as a loading control.

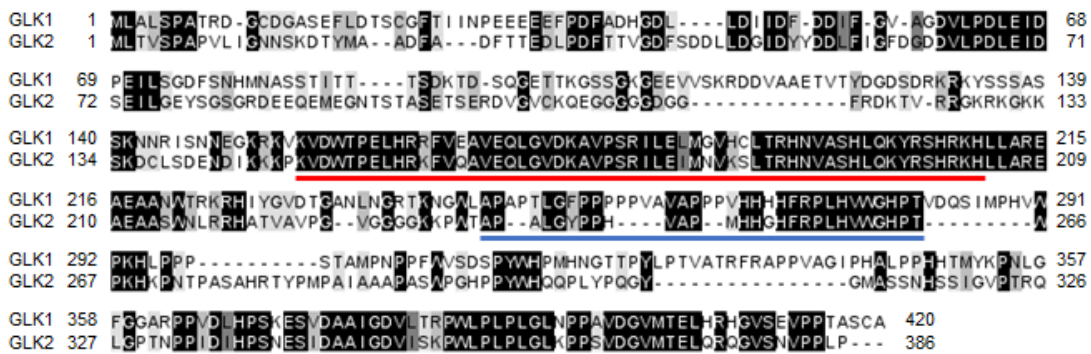

944 **Supplemental Figure 2. Sequence alignment of Arabidopsis GLK1 and GLK2 proteins.**

945 The conserved amino acid sequences were aligned using the Clustal Omega software  
 946 (<https://www.ebi.ac.uk/Tools/msa/clustalo/>) before shading with the Jalview program. The boxes with  
 947 different colors indicate identical and similar amino acids (black: 100%; dark gray: ≥75%; light gray:  
 948 ≥50%). Red, blue, and green lines indicate region of DNA-binding domain (DBD), proline-rich domain  
 949 (PRD), and GLK/C-terminal box (GCT-box), respectively.

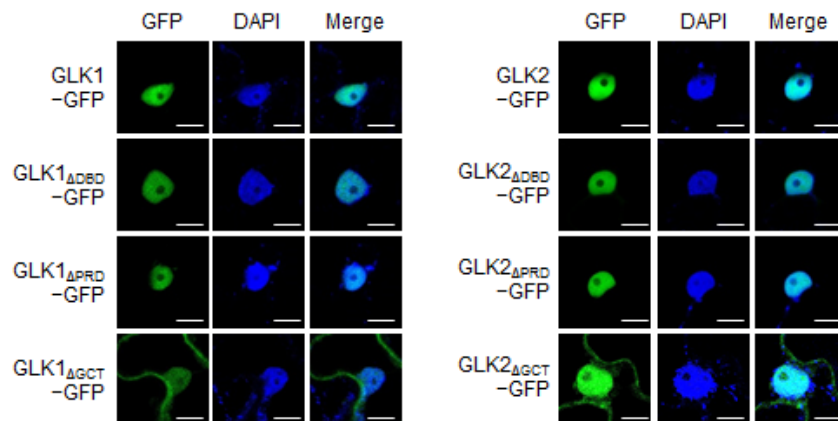

950 **Supplemental Figure 3. Domain-deleted GLK1 and GLK2 variants localize to the nucleus.**

951 Subcellular localization of GFP-tagged intact GLK1/2 and their domain-deleted variants upon transient  
 952 expression in *N. benthamiana* leaves. DAPI was used to stain the nucleus. All images were taken at the  
 953 same scale (scale bars: 10 μm).

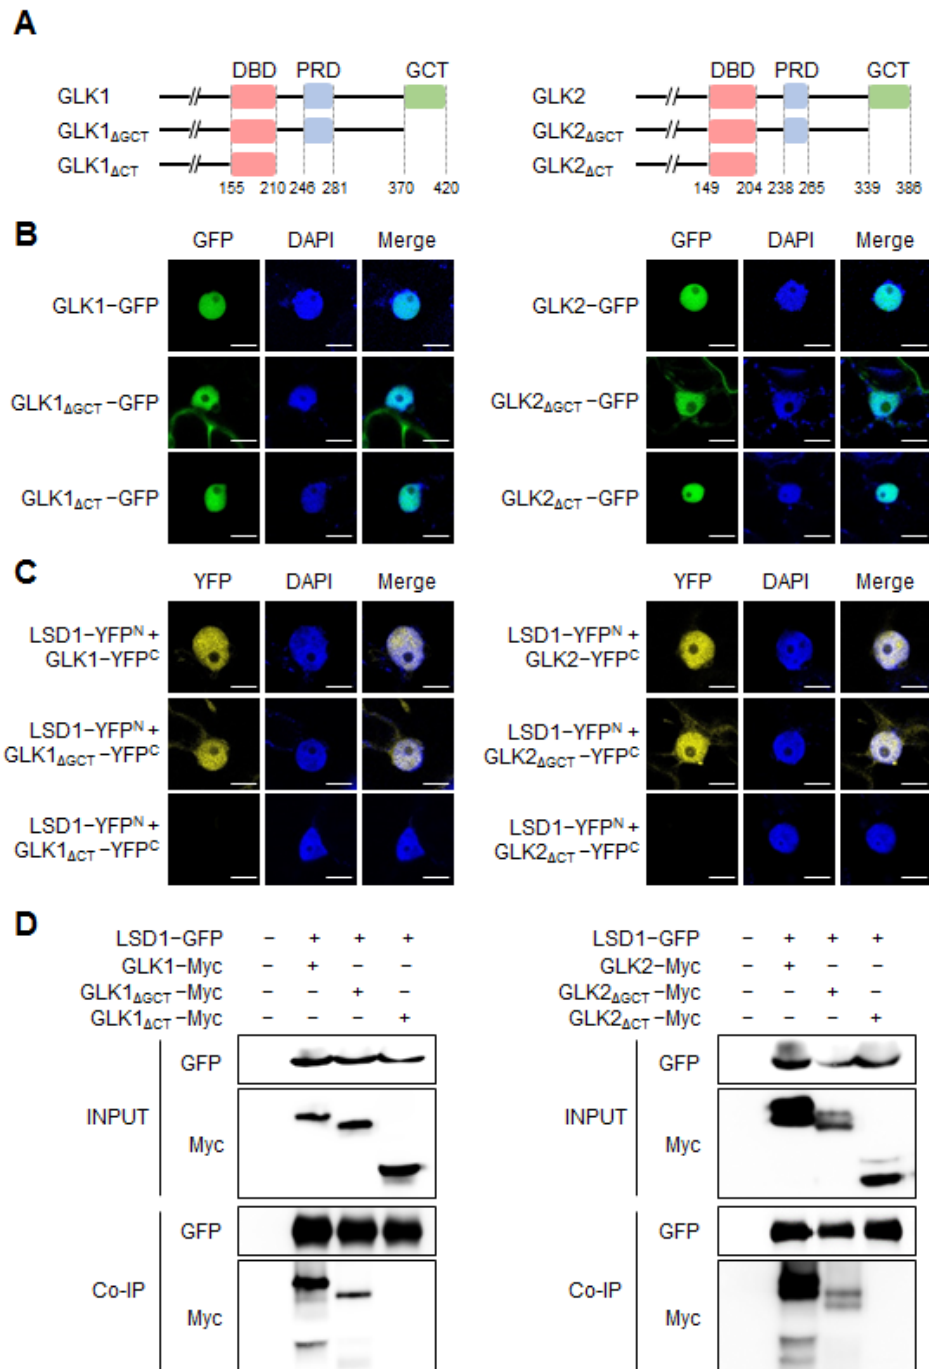

954 **Supplemental Figure 4. The C-terminal PRD region of GLKs is critical for LSD1-GLKs interaction.**

955 (A) Schematic diagram of GLK1/2 and their C-terminally truncated variant proteins.

956 (B) Subcellular localization of GFP-tagged protein variants (A) upon transient expression in *N.*

957 *benthamiana* leaves. (C) BiFC analysis. The intact or truncated variants of GLK1 or GLK2 fused with

958 YFP<sup>C</sup> were individually coexpressed with LSD1 fused with YFP<sup>N</sup> in *N. benthamiana* leaves. In (B) and

959 (C), DAPI was used to stain the nucleus. All images were taken at the same scale (scale bars: 10  $\mu$ m).

960 (D) Co-IP analyses using *N. benthamiana* leaves coexpressing LSD1-GFP with indicated intact or

961 truncated variants of GLK1 (or GLK2) fused with Myc-tag. GFP-Trap beads were used, and the

962 interaction was evaluated by using Myc antibody.

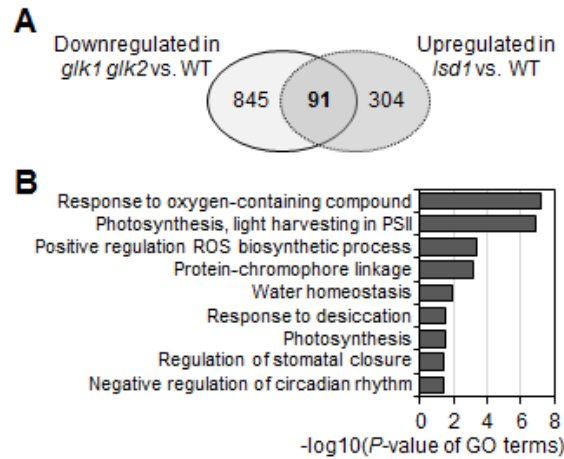

963 **Supplemental Figure 5. Loss of LSD1 leads to an upregulation of GLK target genes.**  
 964 (A) Venn diagram showing the numbers of uncommon and overlapped genes between upregulated genes  
 965 (395) in 17-d-old *lsd1* (Lv et al., 2019) and downregulated genes (936) in *glk1 glk2* (Ni et al., 2017).  
 966 (B) Gene Ontology (GO) enrichment analysis towards the biological process of the overlapped genes in  
 967 (A). The GO enrichment analysis was done as described in Methods.

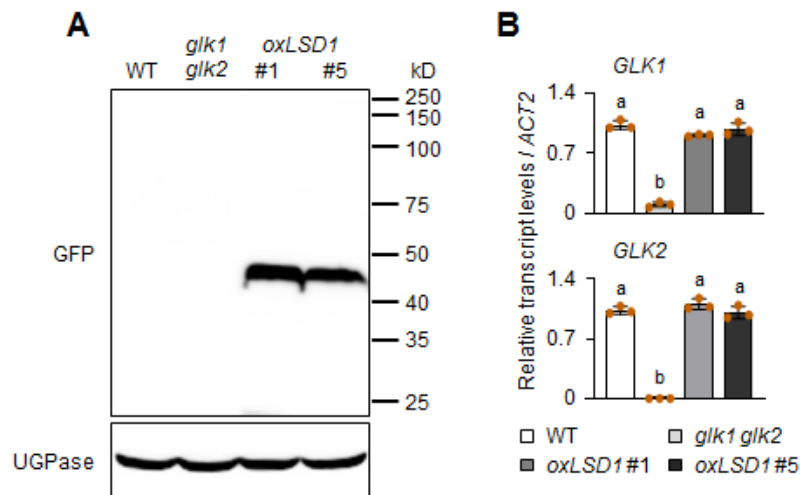

968 **Supplemental Figure 6. Expression levels of *GLK1* and *GLK2* in *oxLSD1* lines.**  
 969 (A and B) Total protein and RNA were extracted from 24-d-old CL-grown plants of WT, *glk1 glk2*, and  
 970 two independent transgenic lines overexpressing GFP-tagged LSD1 under the control of the CaMV 35S  
 971 promoter (*oxLSD1* #1 and #5). The proteins were subjected to an immunoblot assay to detect the LSD1-  
 972 GFP fusion proteins using an anti-GFP antibody (A). UGPase was used as a loading control. The relative  
 973 expression levels of *GLK1* and *GLK2* were analyzed by RT-qPCR (B). *ACT2* was used as an internal  
 974 standard. Data are means  $\pm$  SD (n=3). Lowercase letters indicate statistically significant differences  
 975 between mean values ( $P < 0.01$ , one-way ANOVA with posthoc Tukey's HSD test).

976  
 977  
 978  
 979

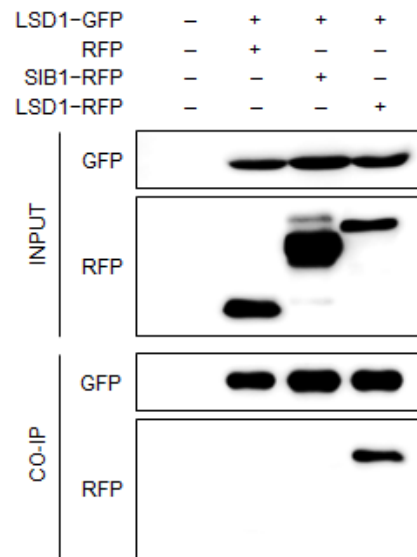

980 **Supplemental Figure 7. LSD1 does not interact with SIB1 *in vivo*.**

981 Co-IP analyses using *Arabidopsis* leaf protoplasts transiently coexpressing LSD1-GFP and SIB1-RFP.

982 LSD1-GFP was also coexpressed with free RFP as a negative control or LSD1-RFP as a positive control.

983 The immunoblot result is one representative of three independent experiments with similar results.

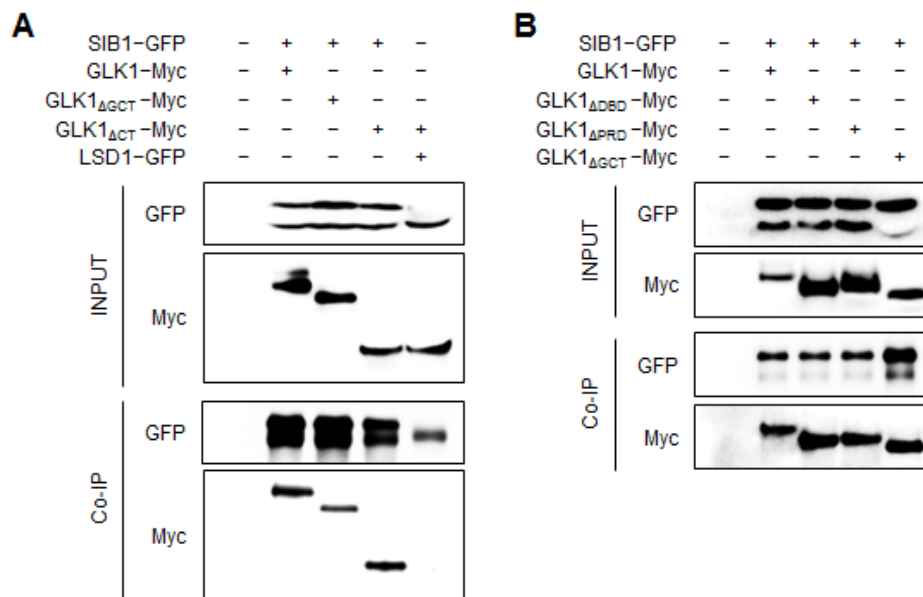

984 **Supplemental Figure 8. SIB1 interacts with GLK1 through the N-terminal region of GLK1.**

985 (A and B) Co-IP analyses using *N. benthamiana* leaves transiently coexpressing SIB1-GFP with intact

986 form and C-terminally truncated (A), or domain-deleted variants (B) of GLK1 fused with Myc-tag.

987 LSD1-GFP was also transiently coexpressed with GLK1<sub>ΔCT</sub>-Myc as a negative control showing a lack of interaction.

988 Co-IP was performed with GFP-Trap beads, and the interaction was evaluated by using

989 the Myc antibody.

990

991

992 SUPPLEMENTAL TABLE

993 Supplemental Table 1. List of primer sets used in this study.

| Gene ID   | Gene name      | Mutant alleles | Primer sequence (5' to 3') | Primer length | Size (bp) | Used for |
|-----------|----------------|----------------|----------------------------|---------------|-----------|----------|
| At3g18780 | <i>ACT2</i>    | -              | F: TATGTATGTCGCCATCCAA     | 19            | 76        |          |
|           |                |                | R: ACCAGAATCCAGCACAATA     | 19            |           |          |
| At2g34430 | <i>LHCB1.4</i> | -              | F: AGCAGAGGACTTGCTTTACC    | 20            | 115       |          |
|           |                |                | R: CATAGCCAACCTTCCGTTCT    | 20            |           |          |
| At2g05100 | <i>LHCB2.1</i> | -              | F: CAAAGCATCTGGTACGGACCAG  | 22            | 336       |          |
|           |                |                | R: GATGCTTTGCGCGTGGATCAAG  | 22            |           |          |
| At2g05070 | <i>LHCB2.2</i> | -              | F: CGTCAAGTCTACTCCCCAAAG   | 21            | 71        |          |
|           |                |                | R: TCTCCGAGAATGGTCCAAG     | 20            |           |          |
| At3g27690 | <i>LHCB2.3</i> | -              | F: CGGAGAATACCCTGGAGACTA   | 21            | 104       |          |
|           |                |                | R: CCCATCTACTGTGGATCACTTC  | 22            |           |          |
| At1g61520 | <i>LHCB3</i>   | -              | F: CACGAGCTCAAGCAGTGTTTC   | 20            | 92        |          |
|           |                |                | R: CGAGAGAGACAACATCACGA    | 20            |           |          |
| At1g15820 | <i>LHCB6</i>   | -              | F: CGGATTCTCAATCGGTTGAGT   | 21            | 112       |          |
|           |                |                | R: CCCAACGGATCGAAGAATCTC   | 21            |           |          |
| At3g54890 | <i>LHCA1</i>   | -              | F: CCCTTCGTTCTCTCTTCTTC    | 21            | 98        |          |
|           |                |                | R: AGTGAGCAGCCATTCTGATAC   | 21            |           |          |
| At2g20570 | <i>GLK1</i>    | -              | F: GCTACGAGATTTAGAGCACCG   | 21            | 123       | RT-qPCR  |
|           |                |                | R: TTGACGGATGTAAGTCTACC    | 20            |           |          |
| At5g44190 | <i>GLK2</i>    | -              | F: GGCATCAGCAACCACTCTAT    | 20            | 113       |          |
|           |                |                | R: ATGAATGTCGATGGGAGGATTAG | 23            |           |          |
| At4g20380 | <i>LSD1</i>    | -              | F: AAGGGTACCTCTCCCACTAA    | 21            | 136       |          |
|           |                |                | R: CACCAACTTCCGCTTTCATC    | 21            |           |          |
| At1g44446 | <i>CAO</i>     | -              | F: TAGGGGTGAAGACGGGAAACC   | 21            | 134       |          |
|           |                |                | R: CTCCATCGGTTGAGTATTCCC   | 21            |           |          |
| At1g58290 | <i>HEMA1</i>   | -              | F: TAATGGGGTTCGTGTTCTTCCG  | 22            | 111       |          |
|           |                |                | R: ATGCTAGCTGCATTAGACGCAG  | 22            |           |          |
| At3g59400 | <i>GUN4</i>    | -              | F: GCCATCCTGCGTTTGCACAG    | 21            | 104       |          |
|           |                |                | R: GTCTGCTCCTACTCCTGCCTG   | 21            |           |          |
| At5g13630 | <i>GUN5</i>    | -              | F: CTACAGGGCGAACAGAGATAAG  | 22            | 102       |          |
|           |                |                | R: GCTTGCATTAGACTCCCTAGTT  | 22            |           |          |
| At5g54190 | <i>PORA</i>    | -              | F: CCCTCTCCCTCCTTCCAG      | 20            | 122       |          |
|           |                |                | R: GCTCCAATACACTCCCRACTTC  | 22            |           |          |
| At4g27440 | <i>PORB</i>    | -              | F: CAAACCGCTGCGACTTCAAGC   | 21            | 163       |          |
|           |                |                | R: TGCACGCCATTATCACGTTCC   | 21            |           |          |

| Gene ID   | Gene name      | Mutant alleles                   | Primer sequence (5' to 3')                                    | Primer length | Size (bp) | Used for        |
|-----------|----------------|----------------------------------|---------------------------------------------------------------|---------------|-----------|-----------------|
| At1g03630 | <i>PORC</i>    | -                                | F: CAGACAGTTACAGCCACGCCG<br>R: TGTCTGCTAAAGCTTTGGCCG          | 21<br>21      | 133       | RT-qPCR         |
| At4g62830 | <i>LSD1</i>    | Salk_042687<br>( <i>lsd1-2</i> ) | LP: CTGGGATTTGTAAAGCAGCTG<br>RP: TCAAGTTCCATGGAGCAAAAG        | 21<br>21      | -         |                 |
|           |                |                                  | WT-F: CAATAGGCGGGCCTTATCTAG                                   | 23            |           |                 |
|           |                |                                  | WT-R: GATAAGATCTCAGGGTTCGATC<br>TCC                           | 24            |           |                 |
| At2g20570 | <i>GLK1</i>    | <i>Atglk1.1</i>                  | glk1.1-F: ACTGCAGGTTACTGATCCG<br>ATTGTTCTT                    | 29            | -         |                 |
|           |                |                                  | glk1.1-R: CGGGATCCGACACTCTTA<br>ATTAAGTACACTC                 | 33            |           |                 |
|           |                |                                  | WT-F: CGACGGAAGACTTGCCGGAC<br>TT                              | 22            |           | Geno-<br>typing |
|           |                |                                  | WT-R: GTGTAAGTCCGGCGTCCAAT<br>CC                              | 22            |           |                 |
| At5g44190 | <i>GLK2</i>    | <i>Atglk2.1</i>                  | glk2.1-F-1:<br>CCTATTTTCAGTAAGAGTGTGGGGTTT<br>TGG             | 29            | -         |                 |
|           |                |                                  | glk2.1-R-1: GTGTAAGTCCGGCGTCCA<br>ATCC                        | 22            |           |                 |
| At4g33630 | <i>EX1</i>     | Salk_002088<br>( <i>ex1</i> )    | LP: TACCCCAATCACTCAAATTG<br>RP: CACTCCCTCCTCCAAAAGATC         | 21<br>21      | -         |                 |
| At2g34430 | <i>LHCB1.4</i> | -                                | F: CTGTATCTGTTTAGTGATTGGC<br>R: TGAGAGCATGAAGTGGATTGG         | 22<br>21      | 256       |                 |
| At1g61520 | <i>LHCB3</i>   | -                                | F: CCCACCTCTTCTCATCCA<br>R: TGATGCCATTGTCTCTCTCG              | 20<br>20      | 141       | ChIP-<br>qPCR   |
| At1g15820 | <i>LHCB6</i>   | -                                | F: GCAATAAGCCACATAATGCAG<br>R: CTGACCAATTAGGAGTCAGAAAC<br>TAC | 21<br>26      | 225       |                 |
